# Supplementary material for: High-resolution autosomal radiation hybrid maps of the pig genome and their contribution to the genome sequence assembly
Source: PubMed Central journal article supplement (PMC3499281; doi:10.1186/1471-2164-13-585), 2012-11-15

High resolution autosomal radiation hybrid maps of the pig genome and their contribution to the genome sequence assembly.

## Additional File 3

Bertrand Servin, Thomas Faraut, Nathale Iannuccelli, Diana Zelenica, Denis Milan

# SSC1

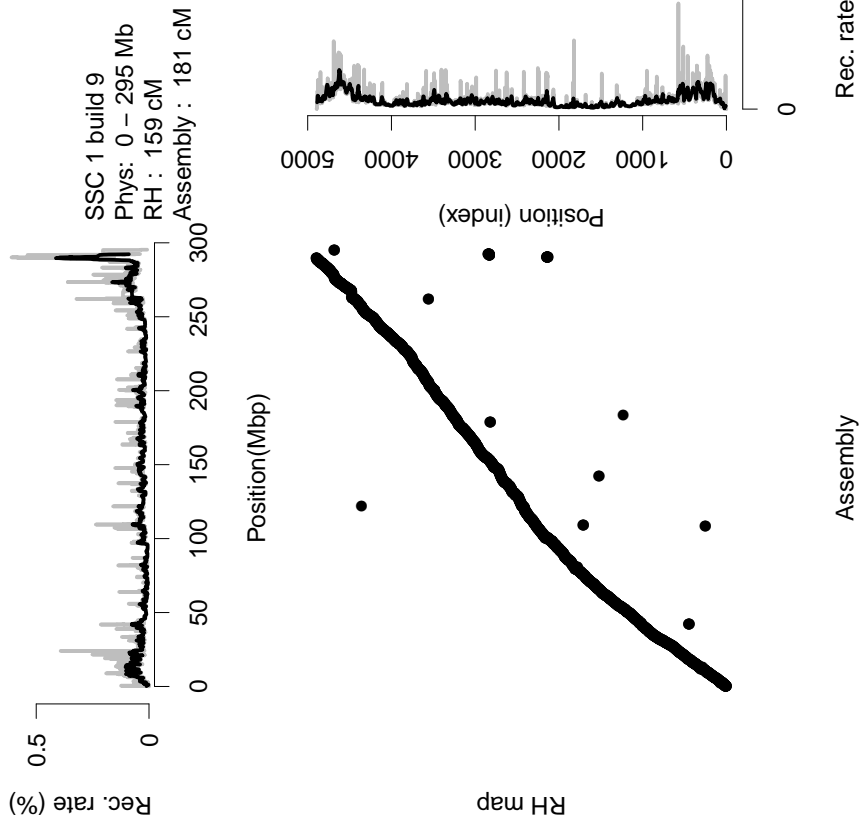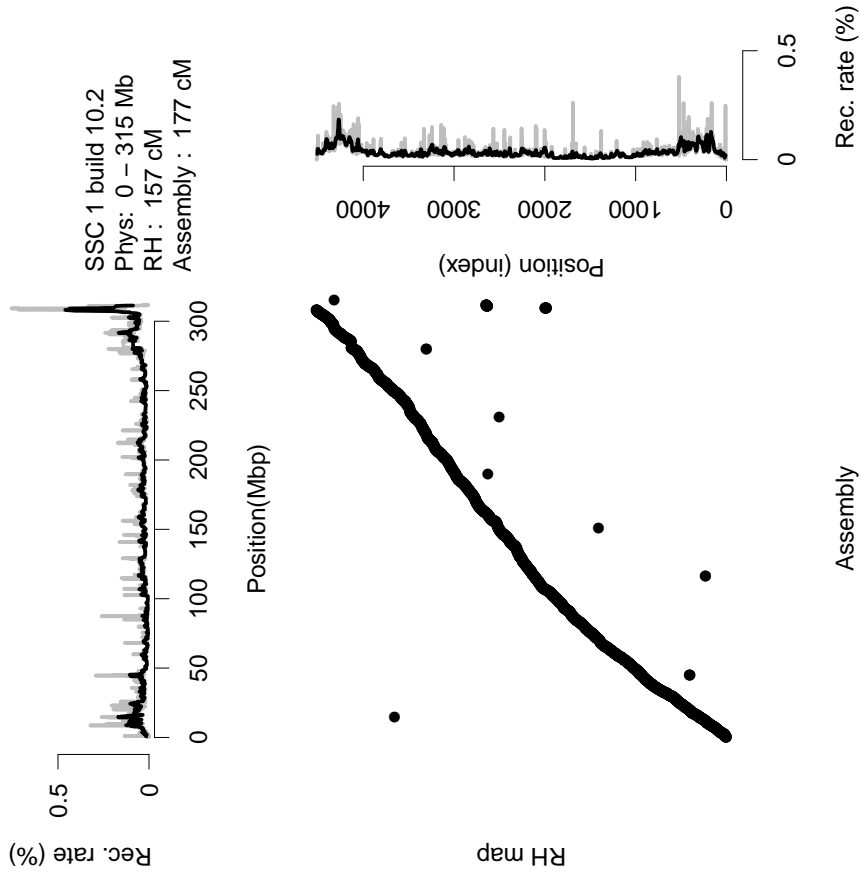

# SSC2

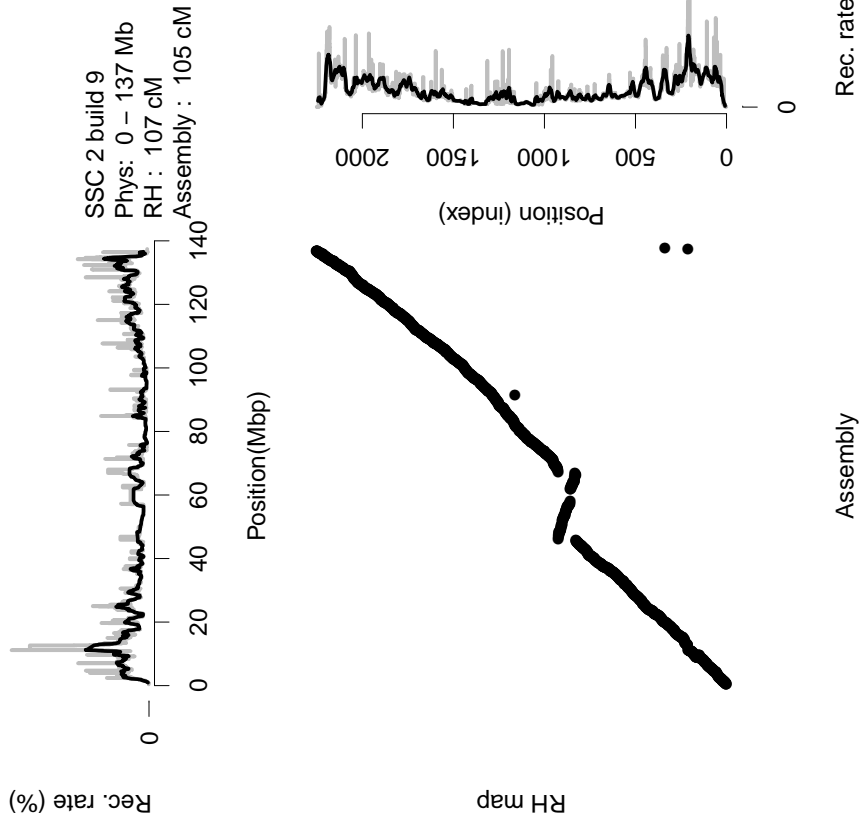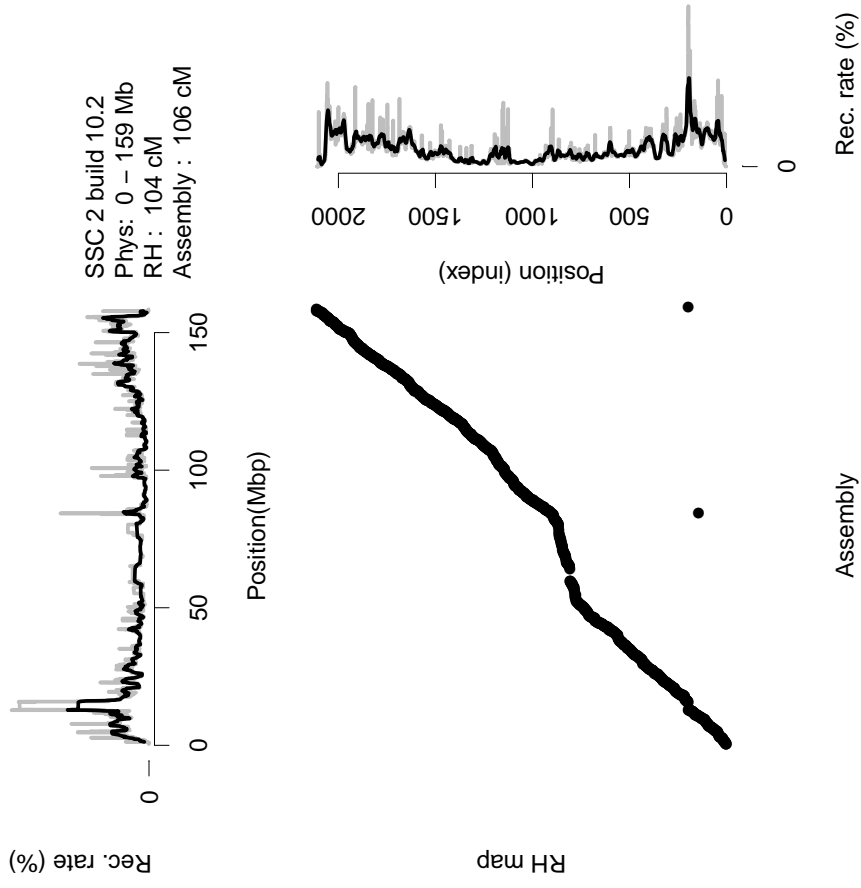

# SSC3

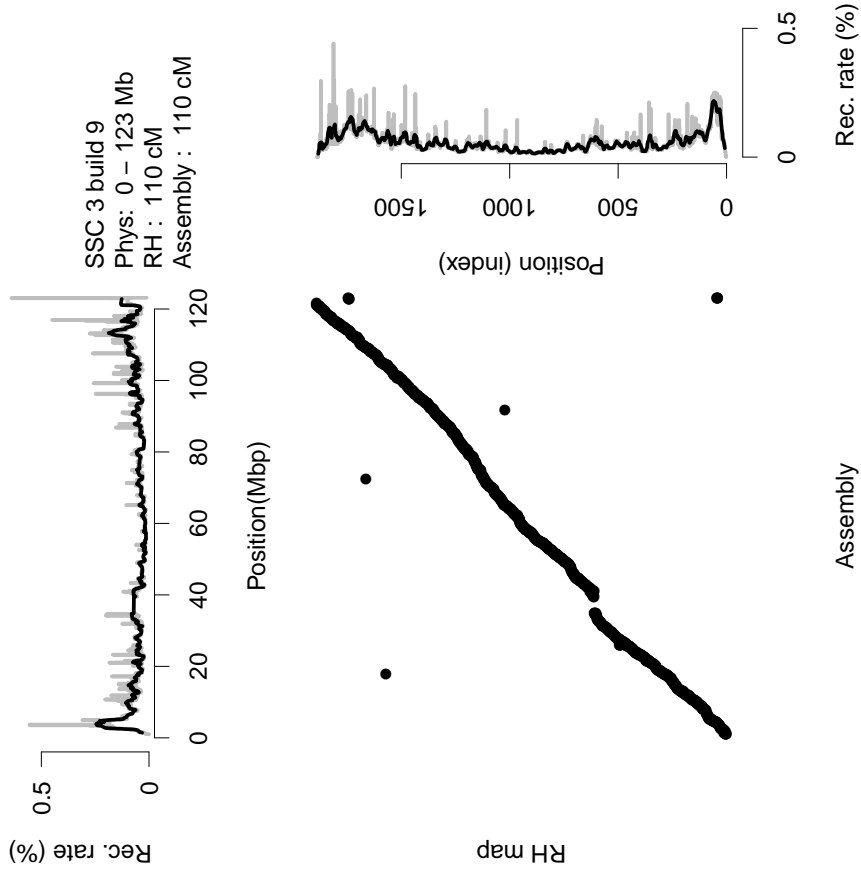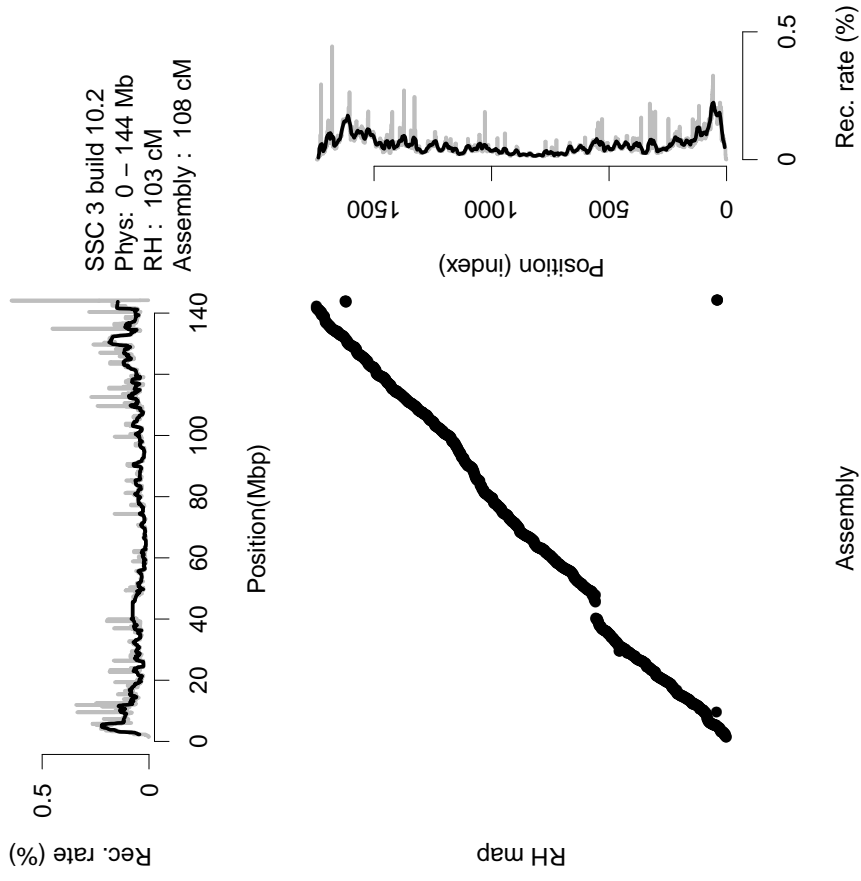

# SSC4

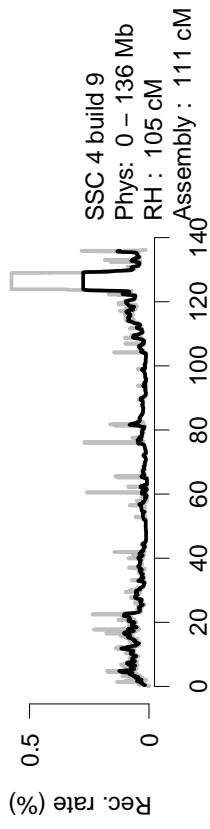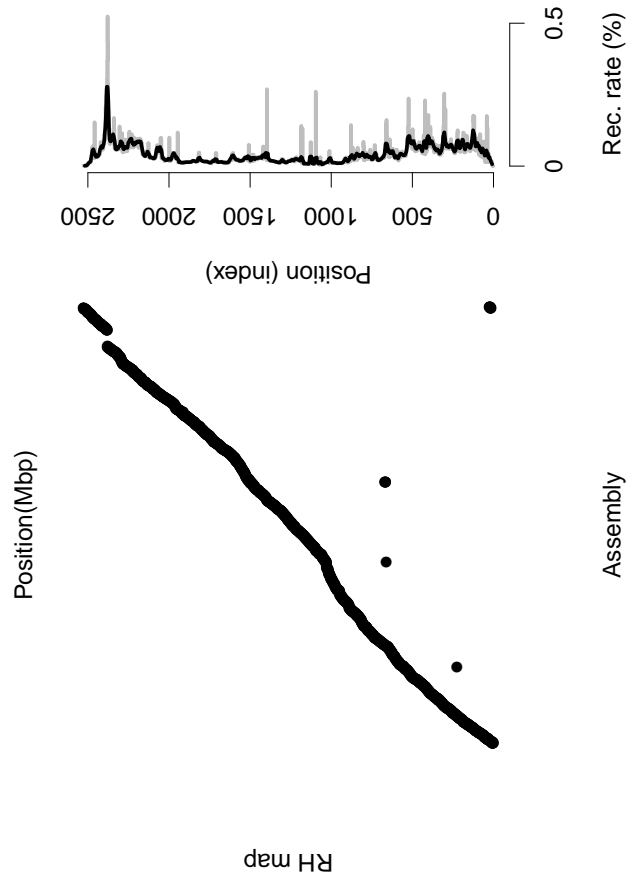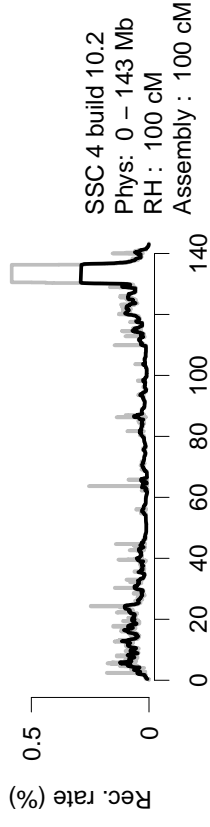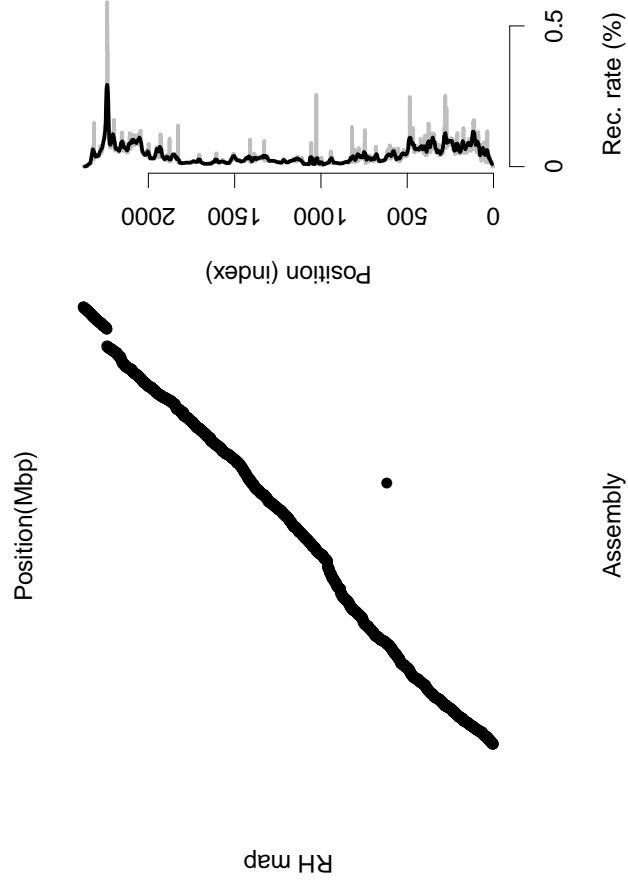

# SSC5

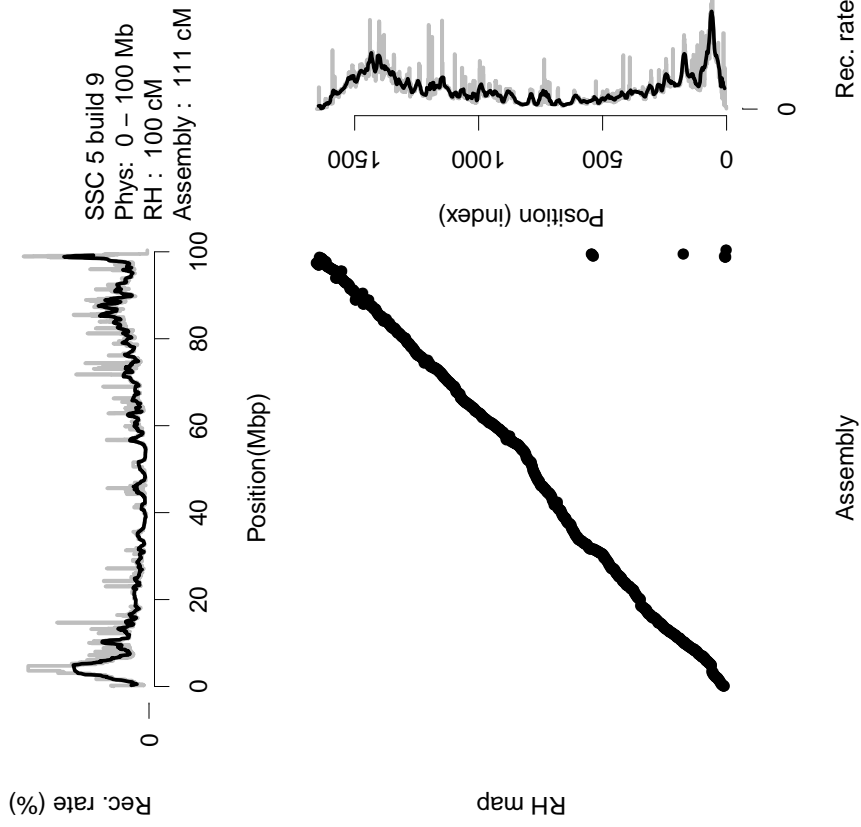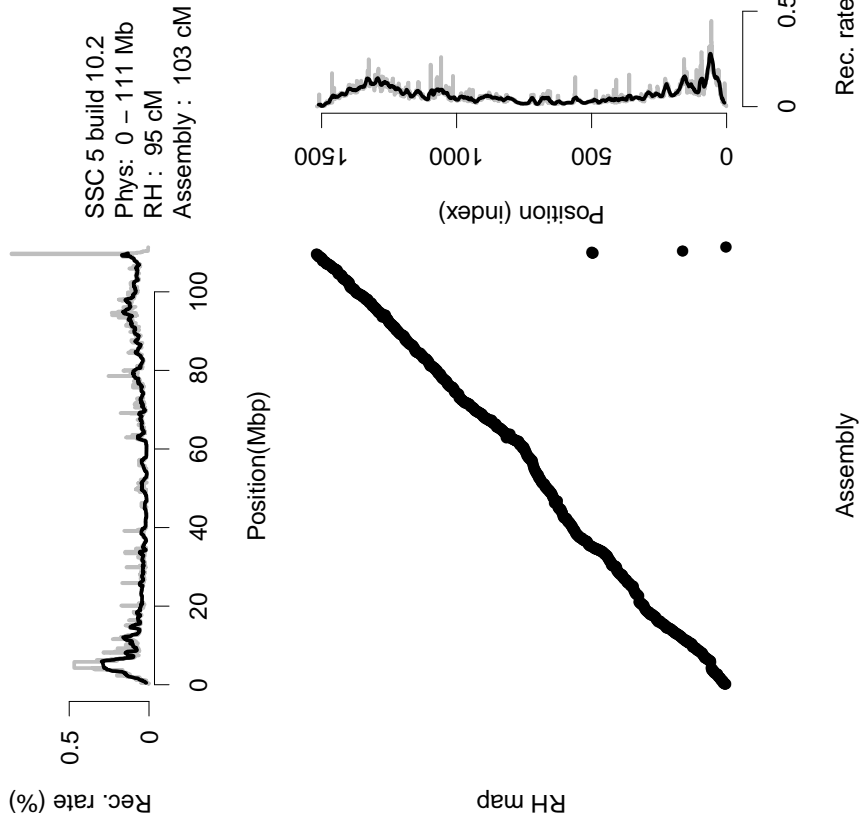

# SSC5 Zoom 1

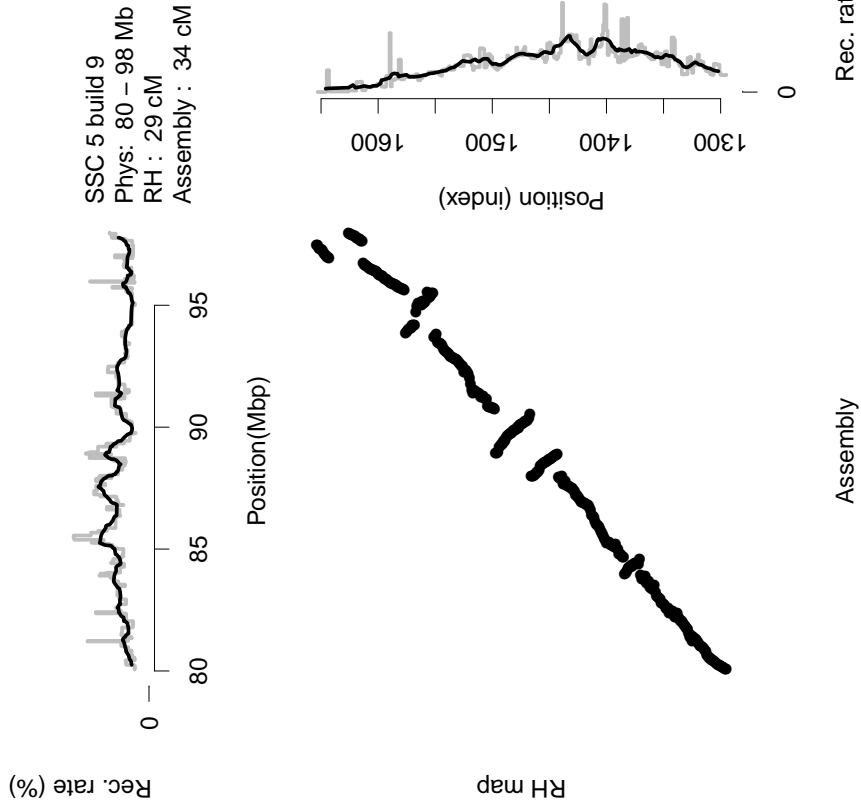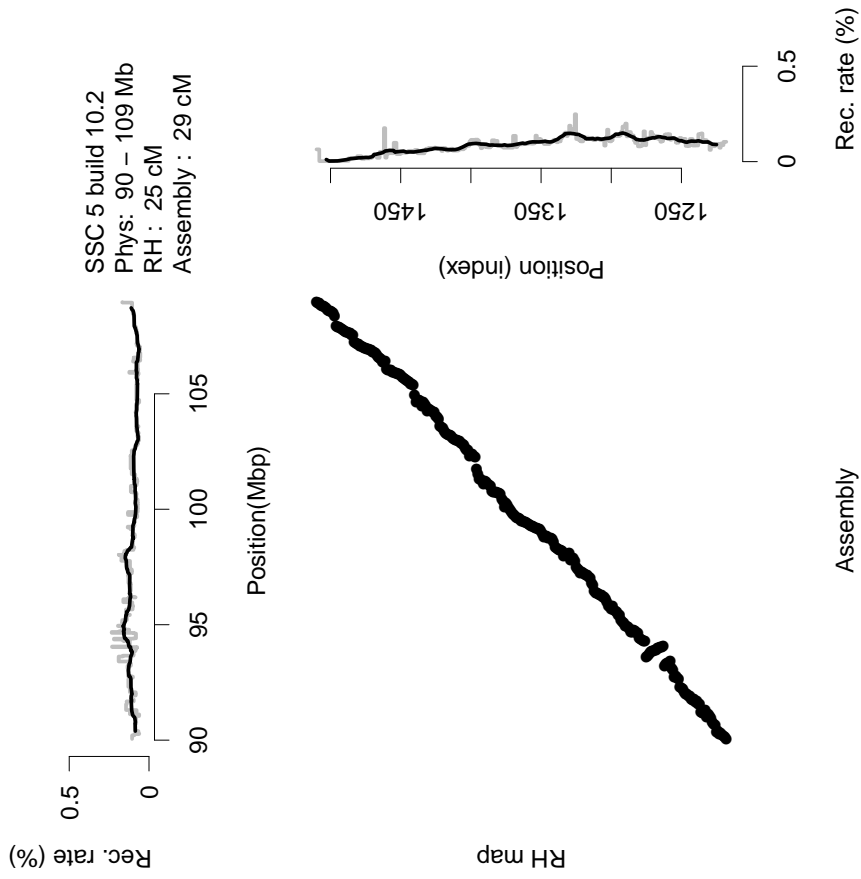

# SSC6

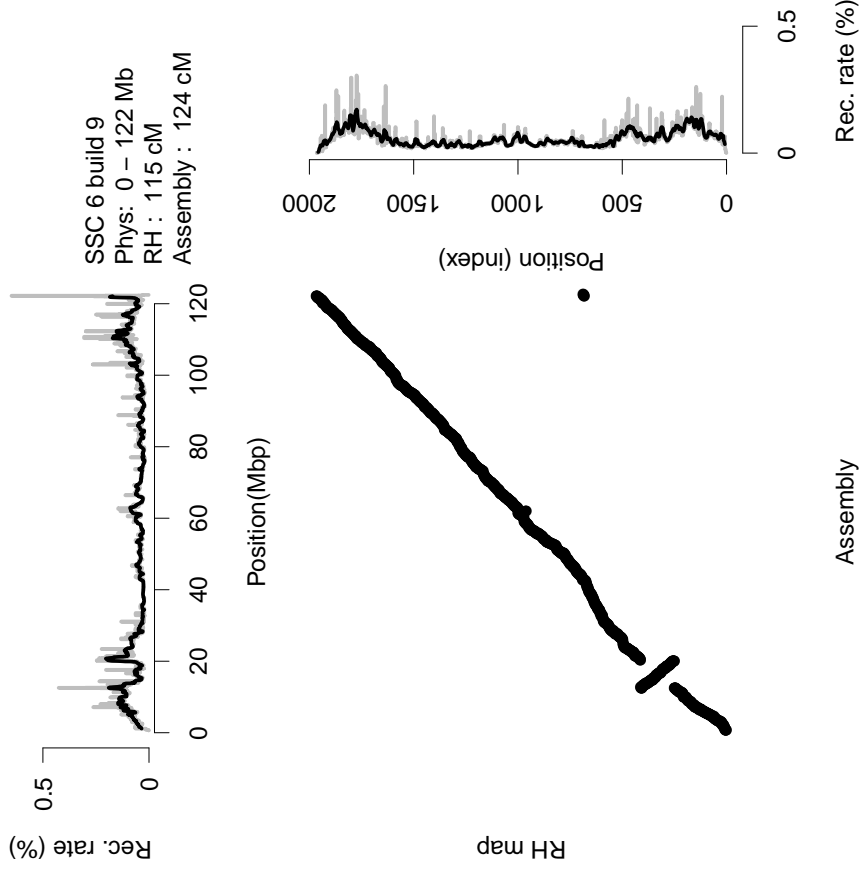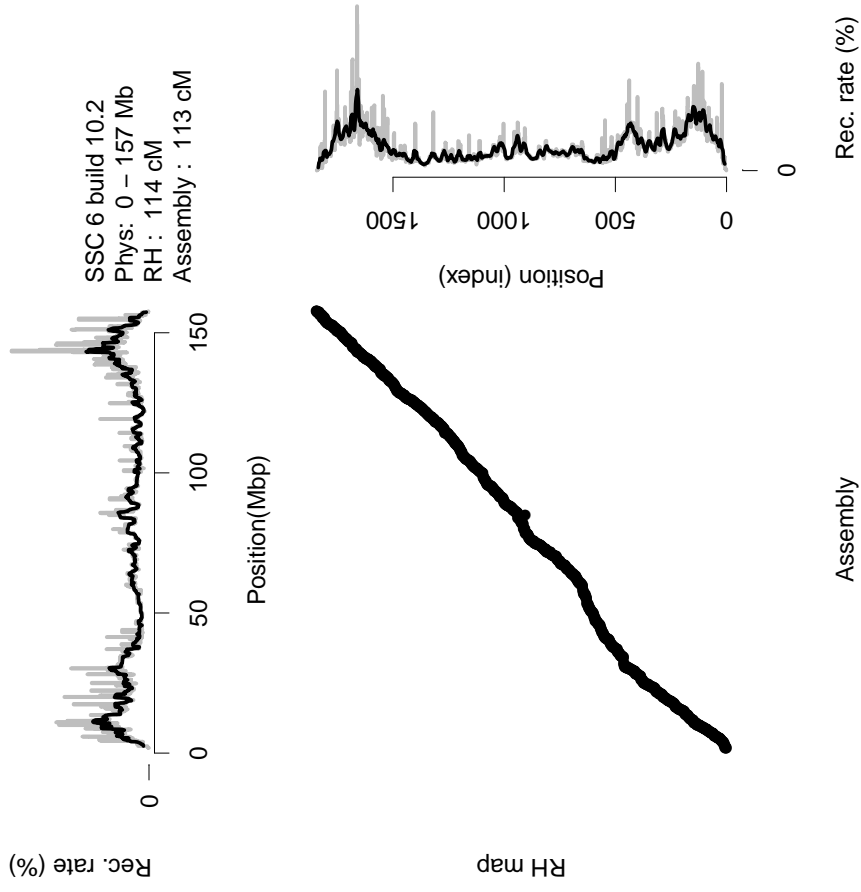



# SSC6 Zoom 1

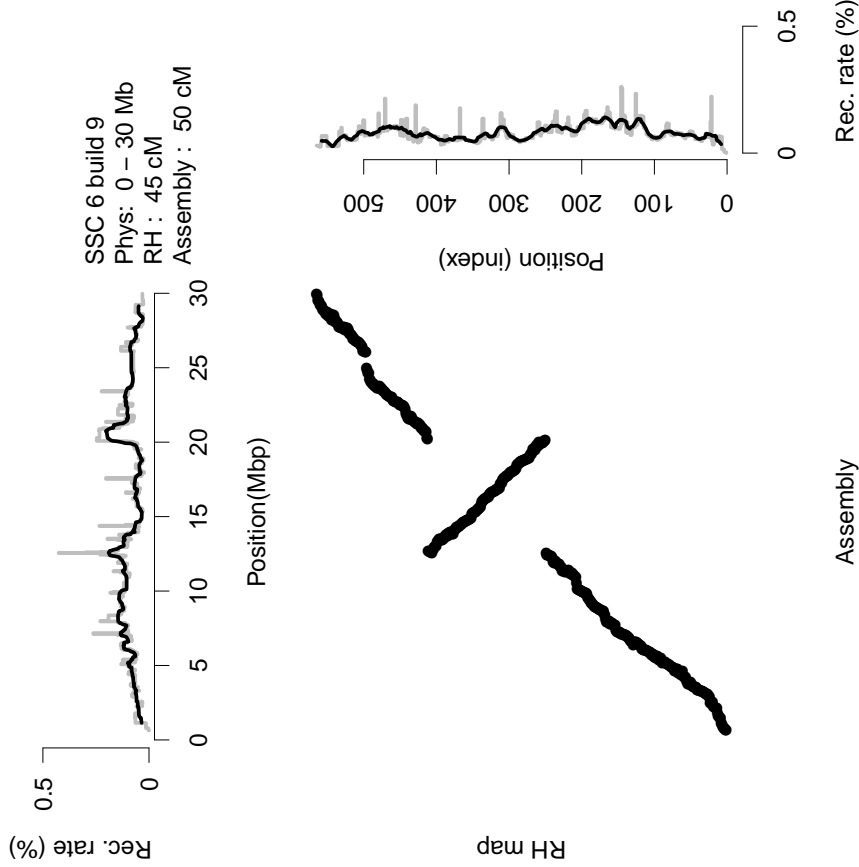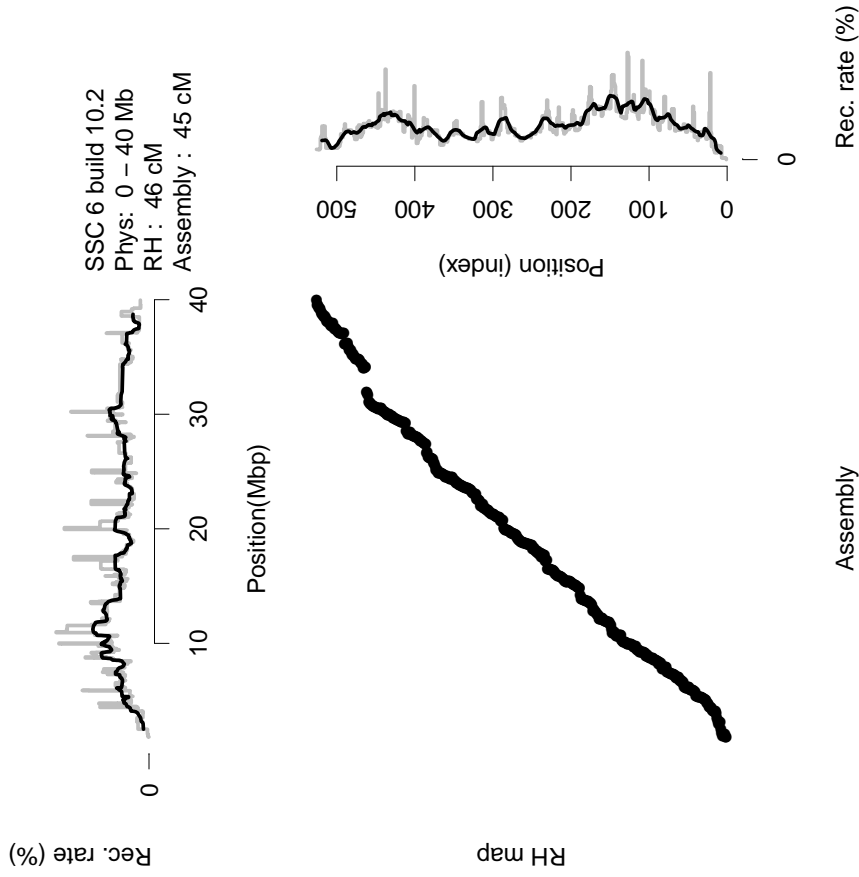

# SSC7

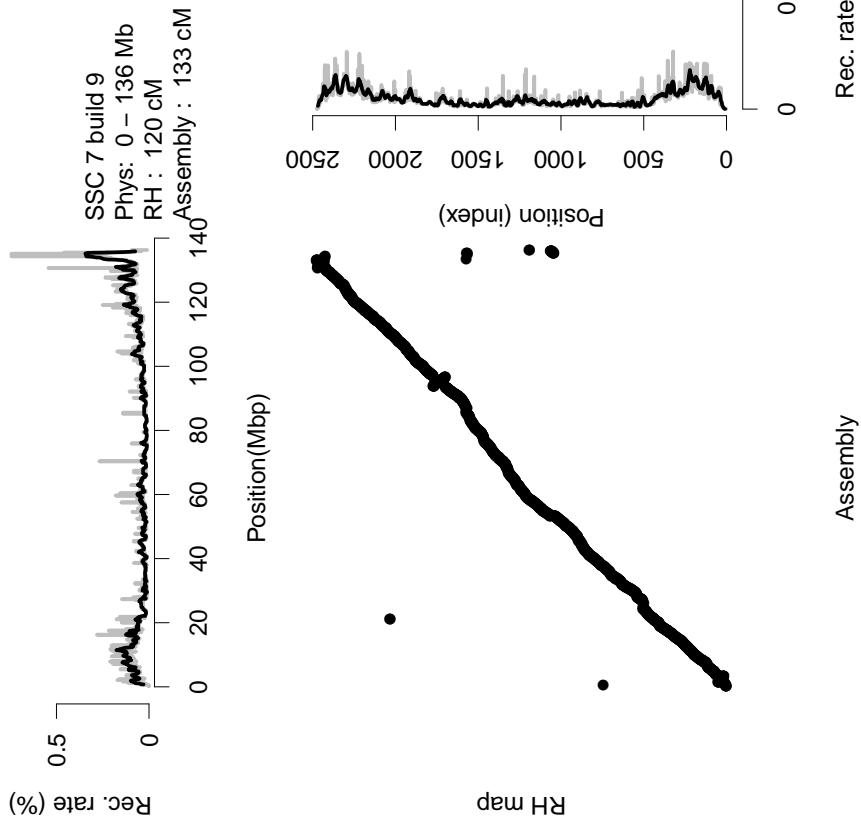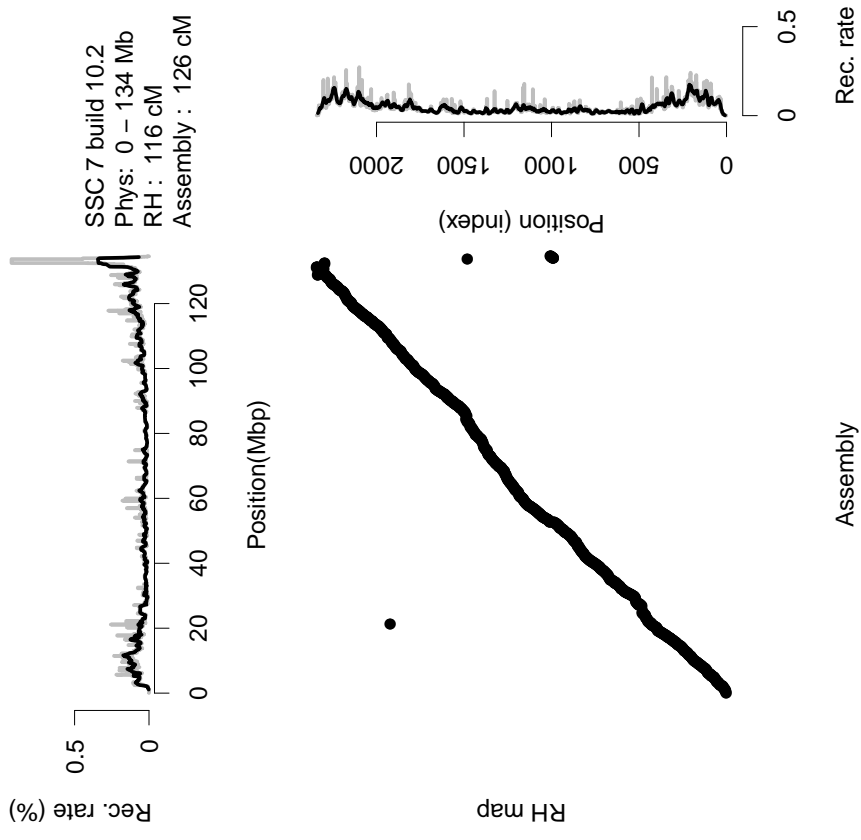

# SSC7 Zoom 1

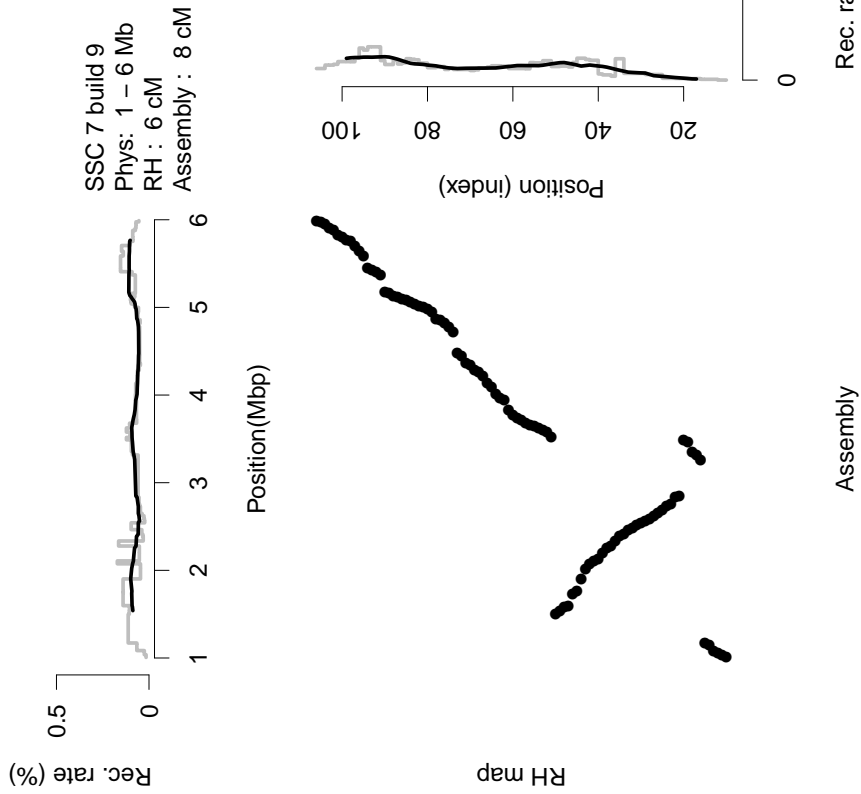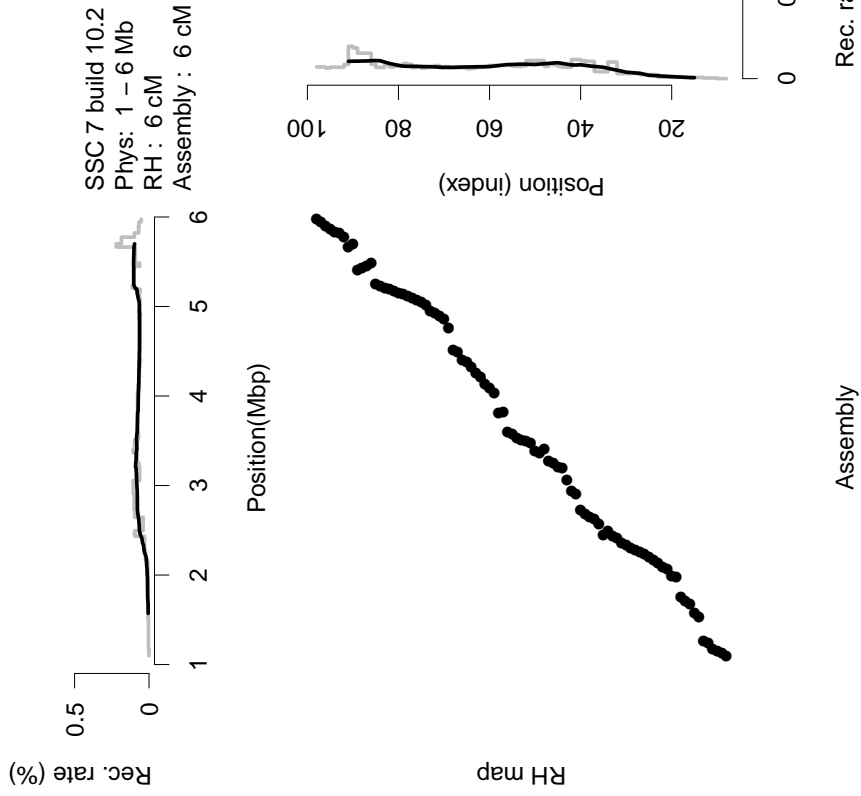

# SSC7 Zoom 2

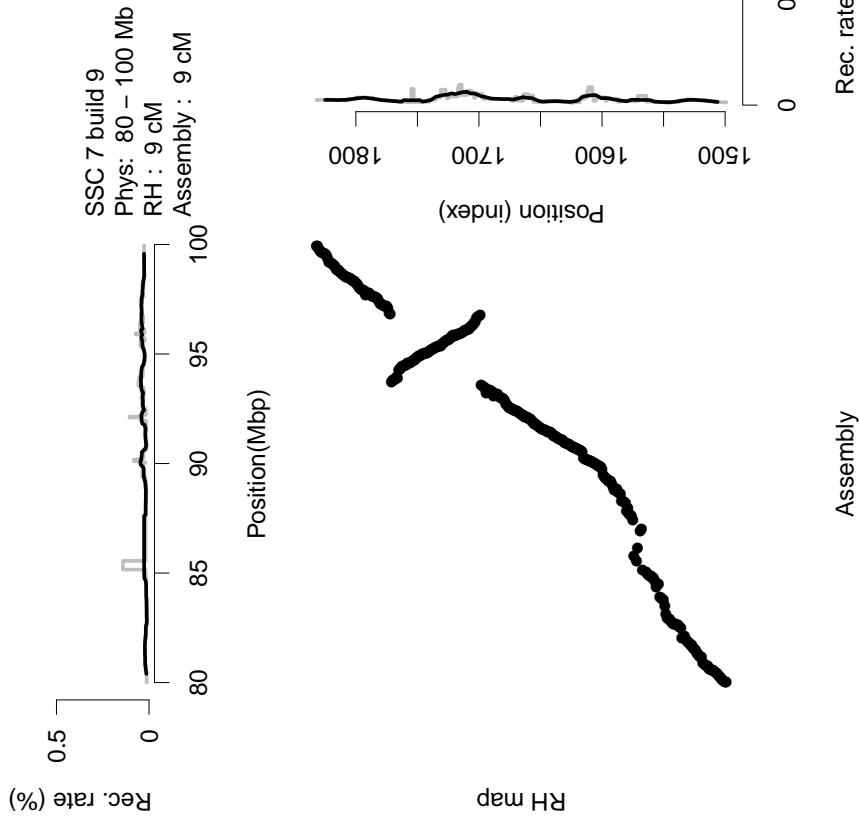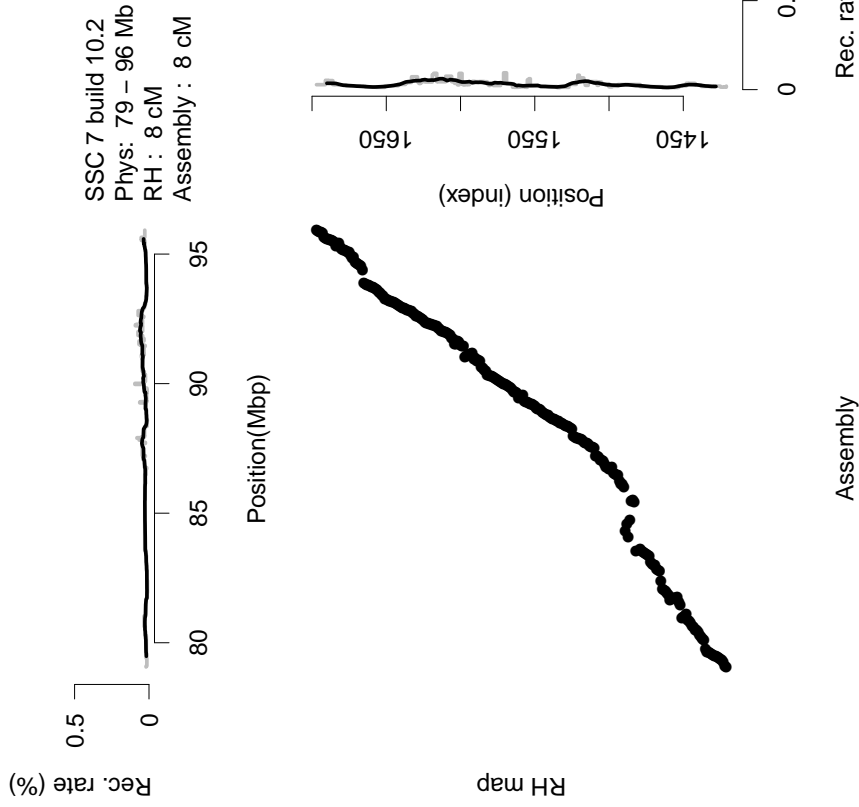

# SSC7 Zoom 3

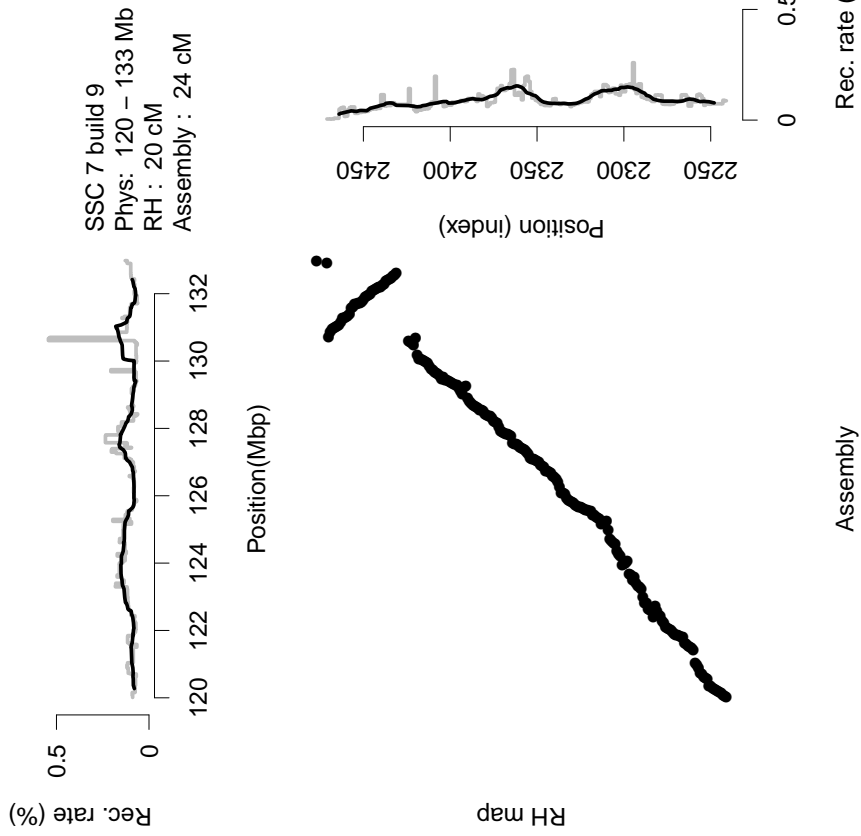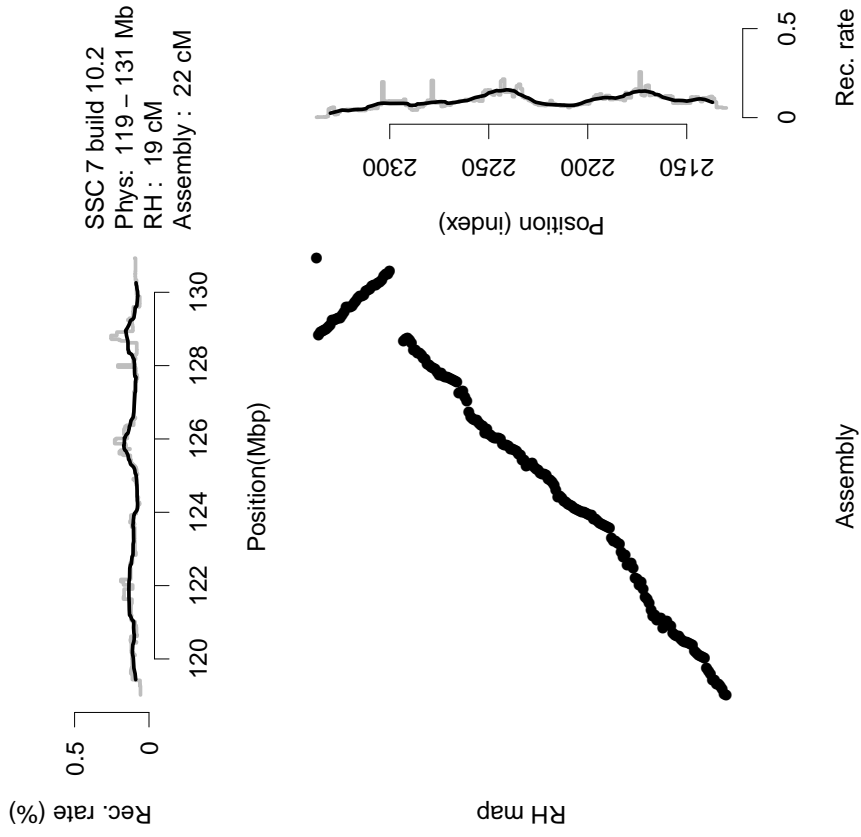

# SSC8

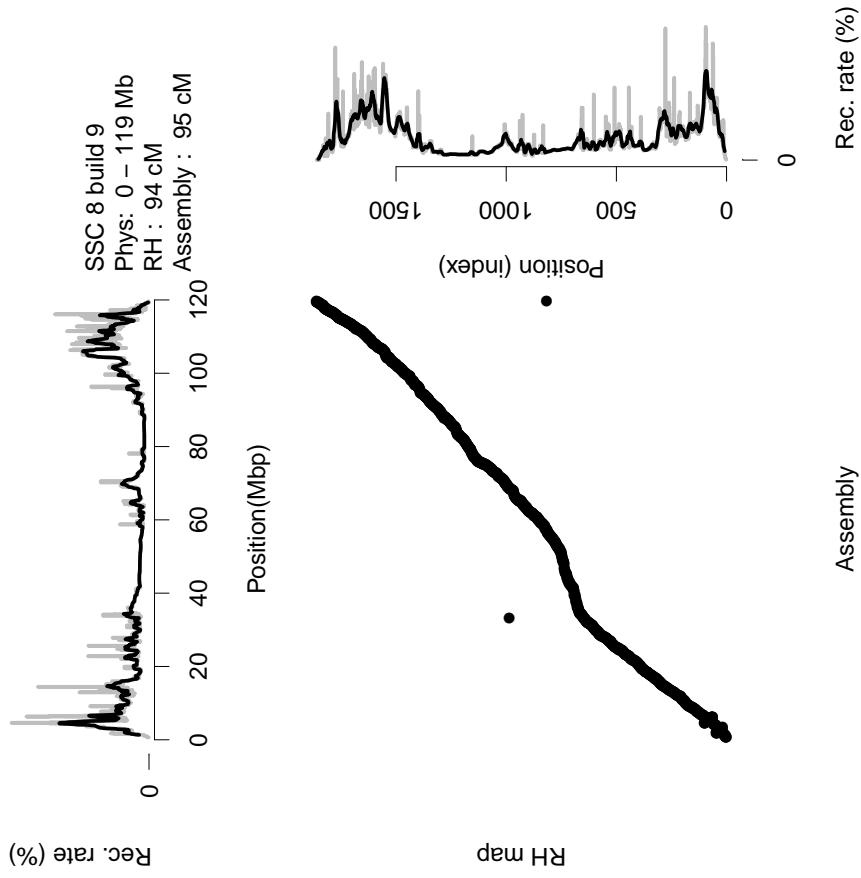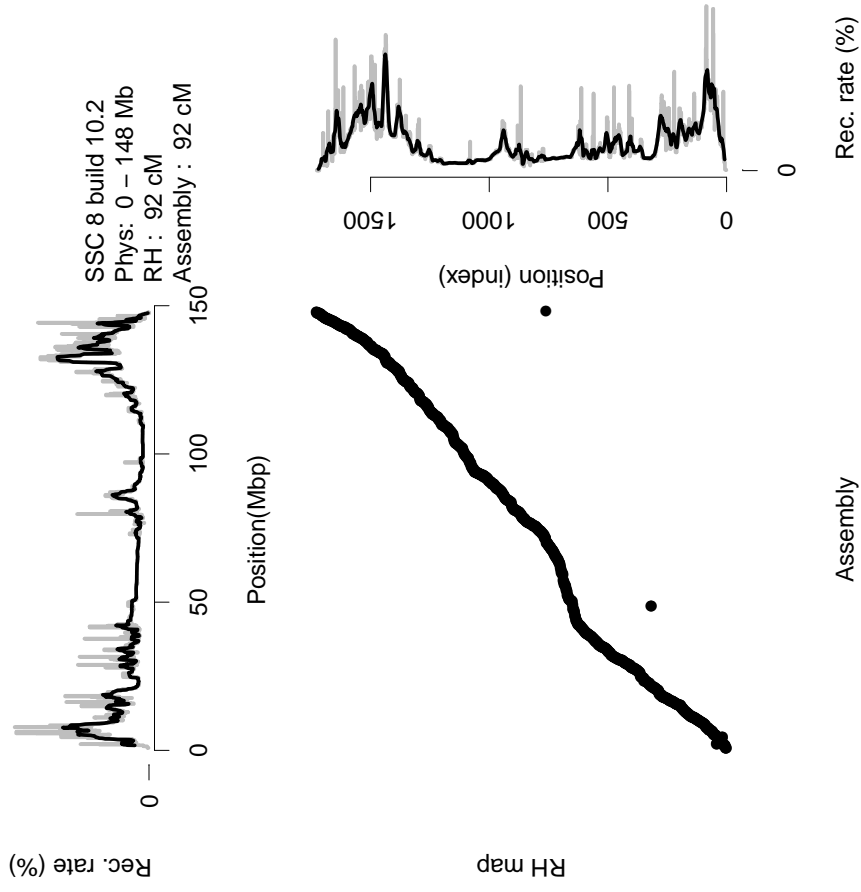

# SSC8 Zoom 1

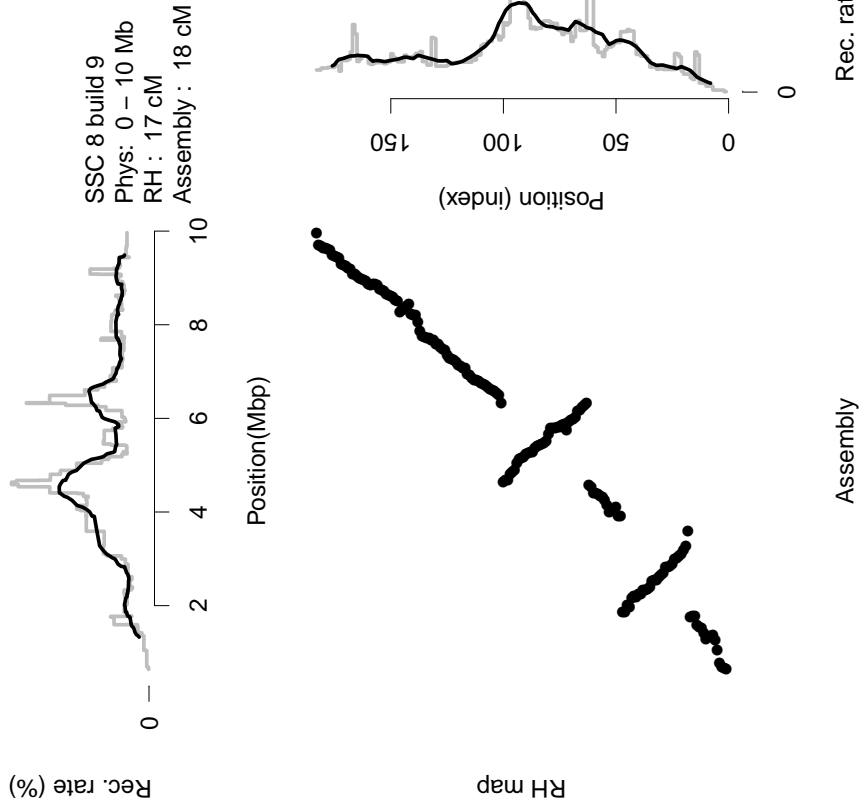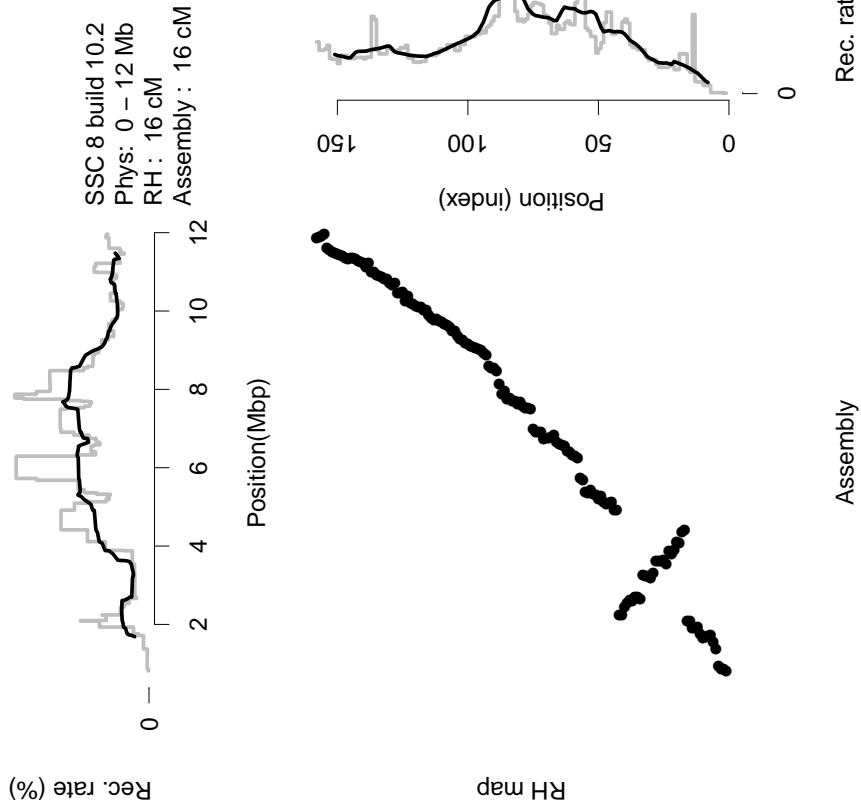

# SSC9

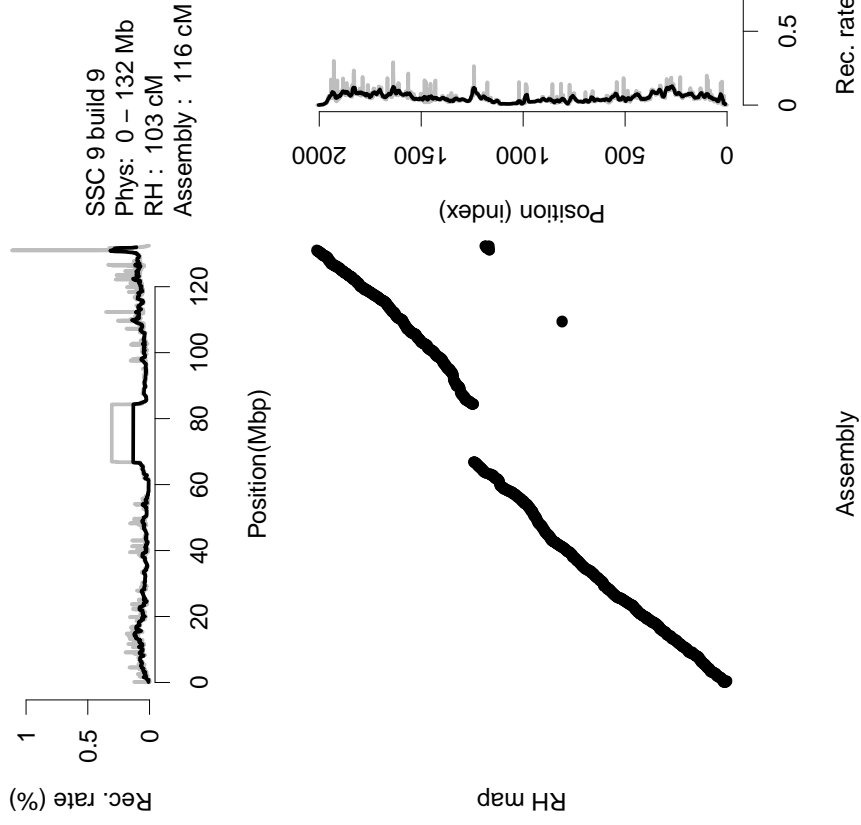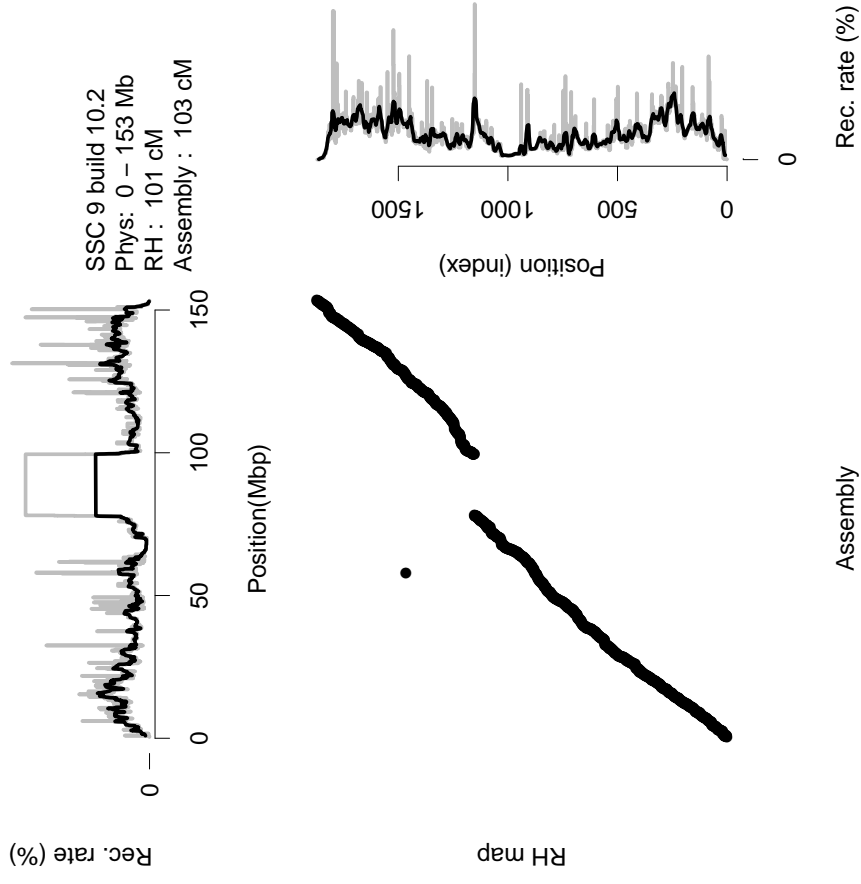



# SSC9 Zoom 1

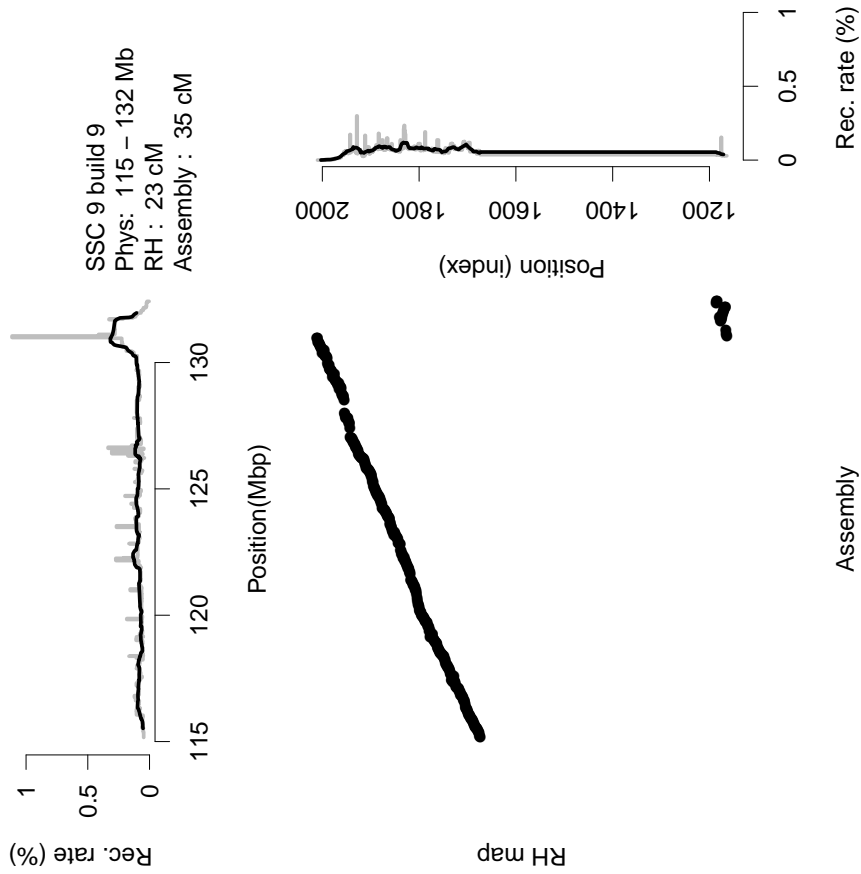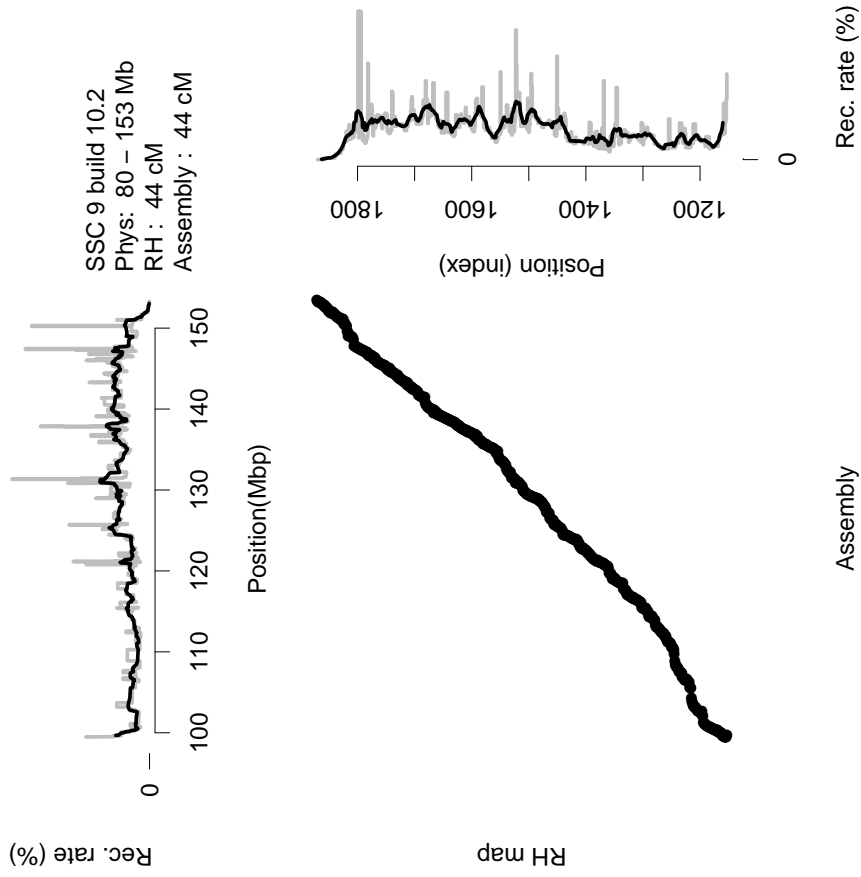

# SSC10

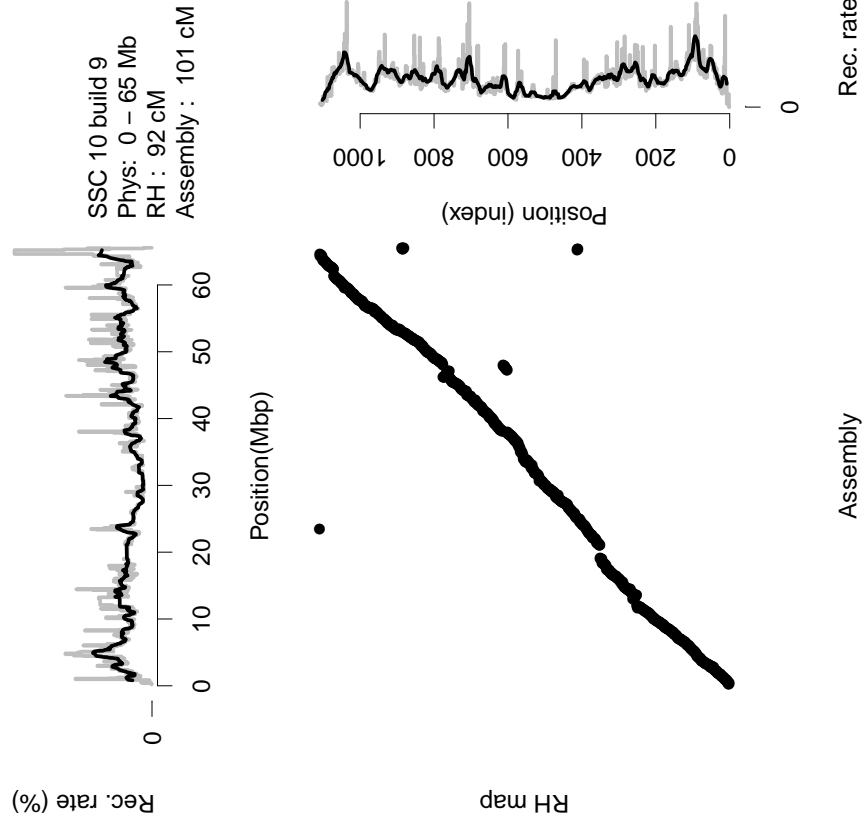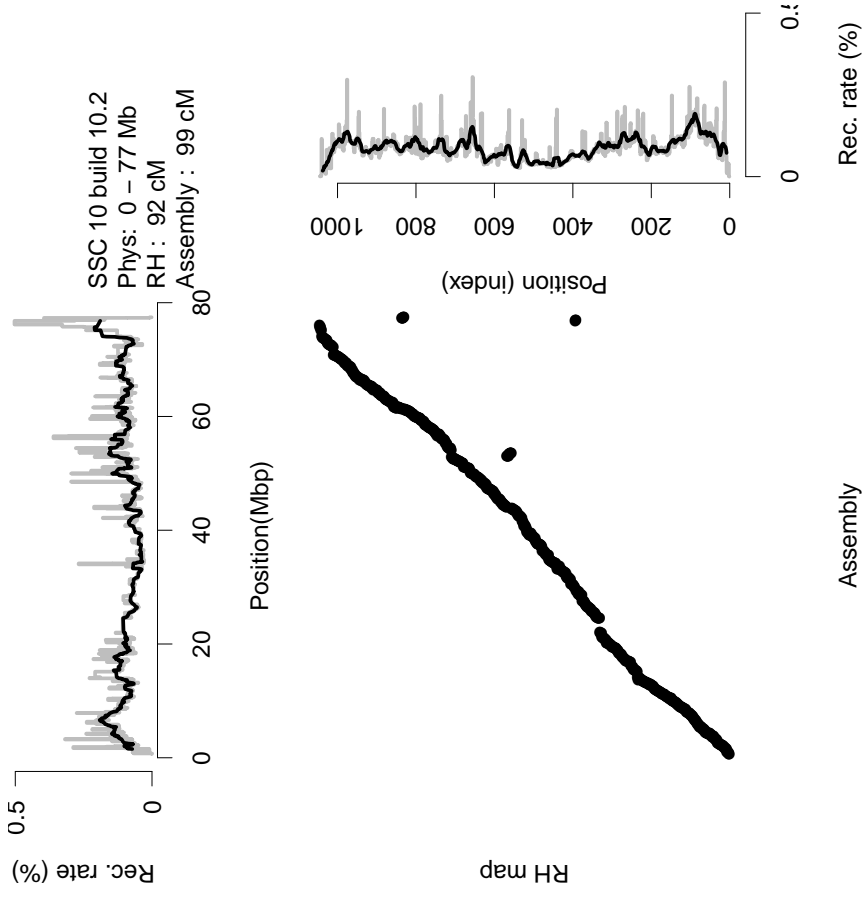

# SSC10 Zoom 1

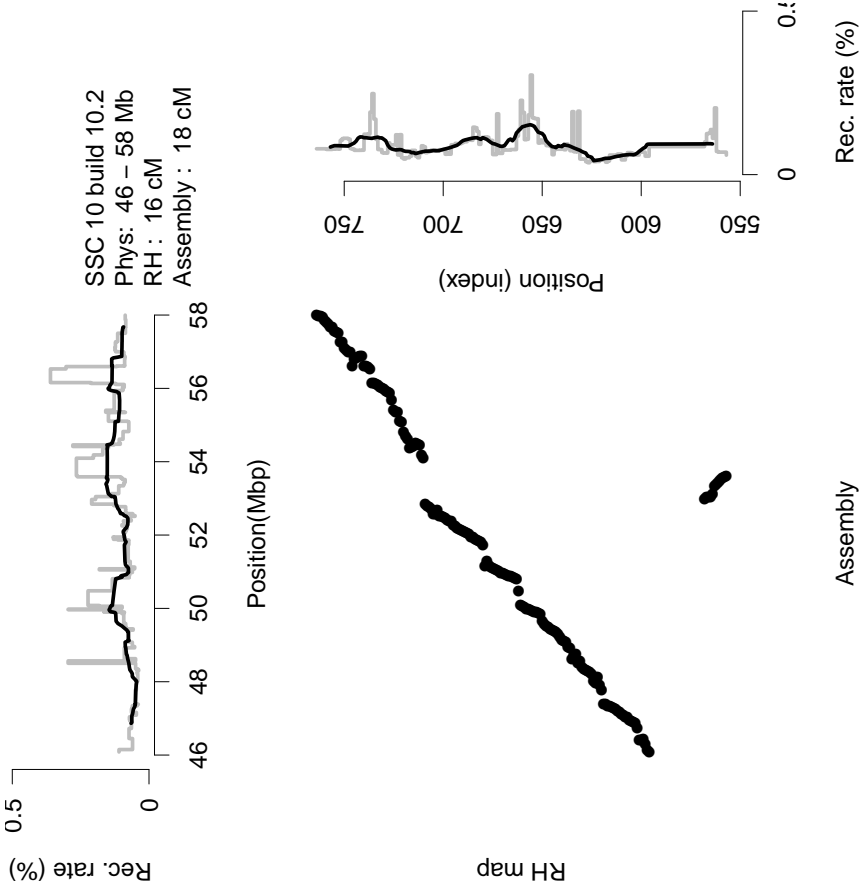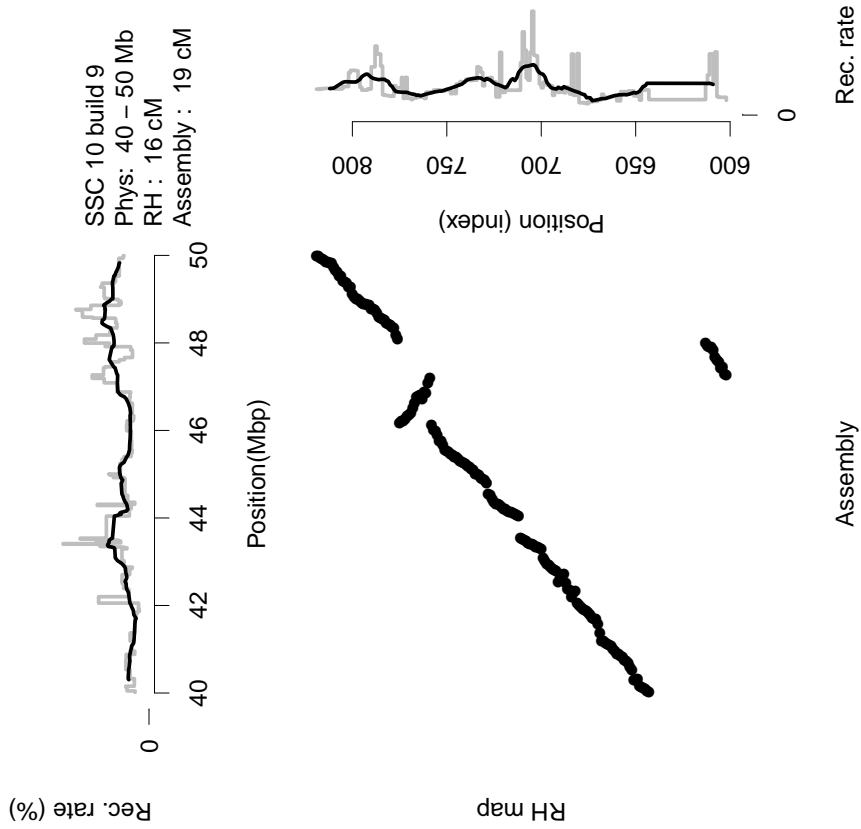

# SSC11

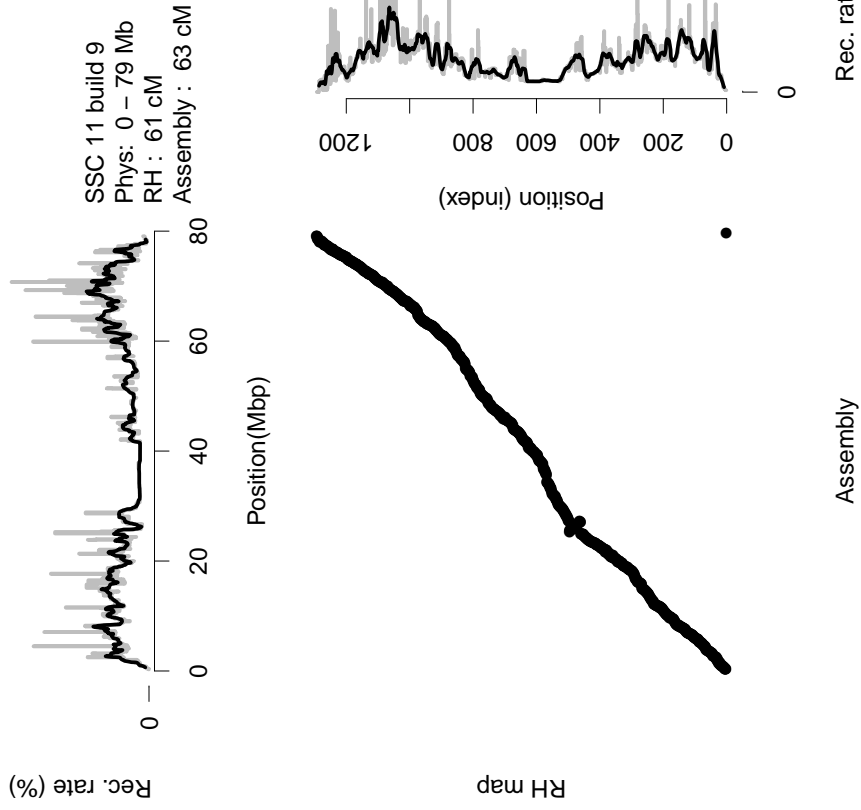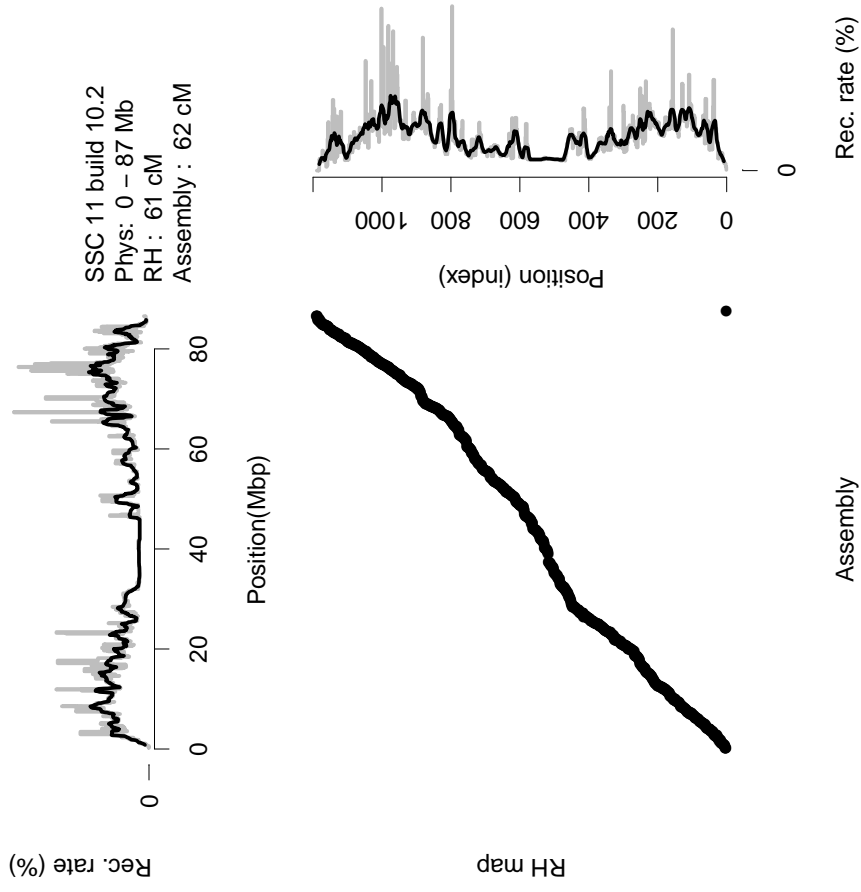

# SSC11 Zoom 1

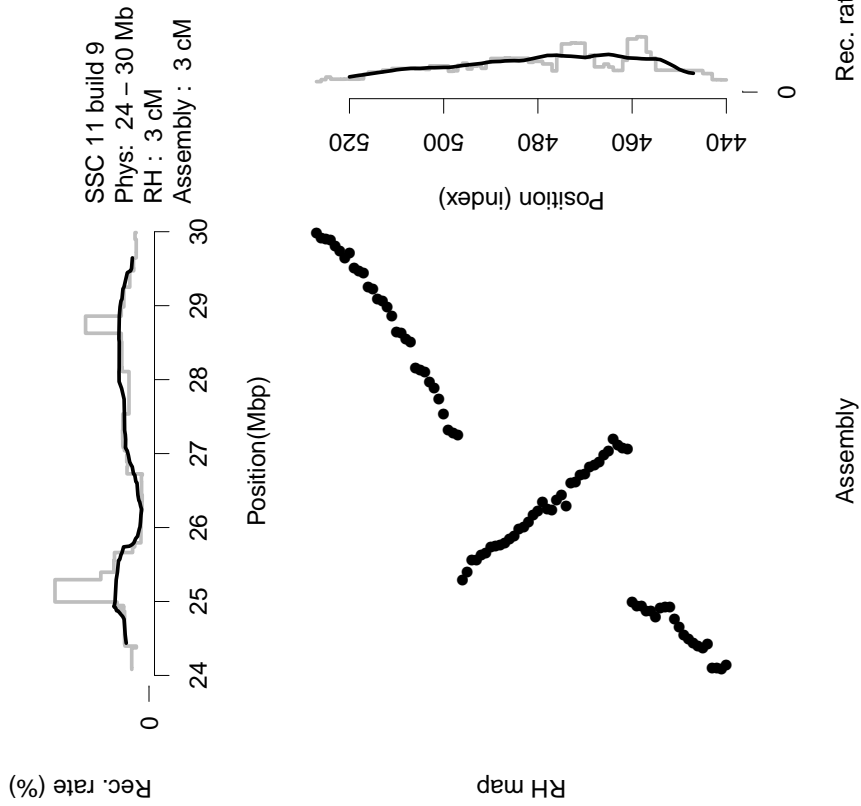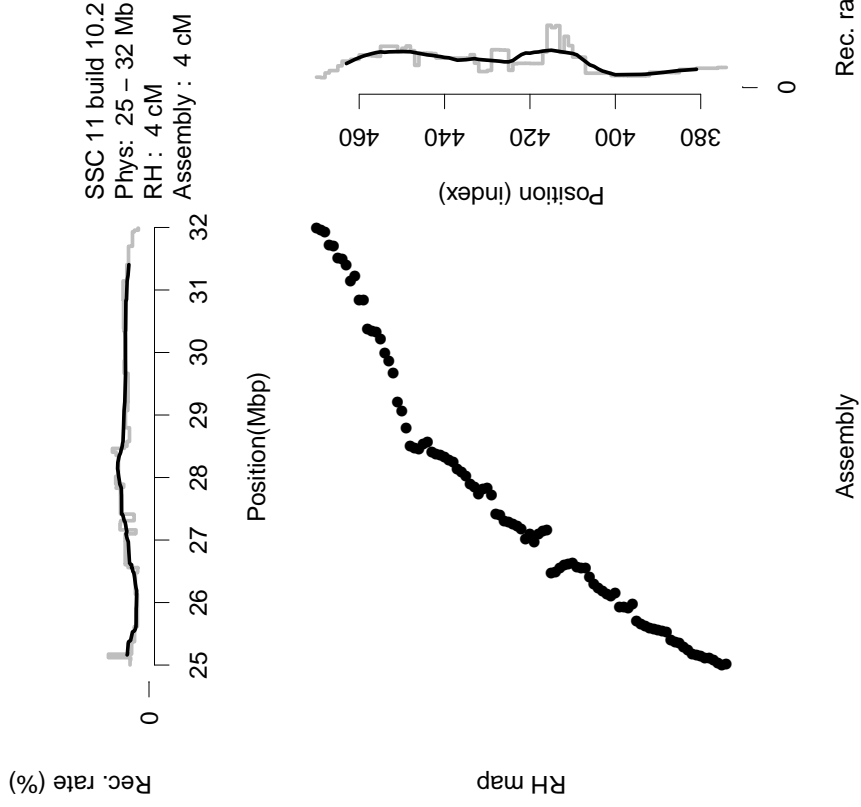

# SSC12

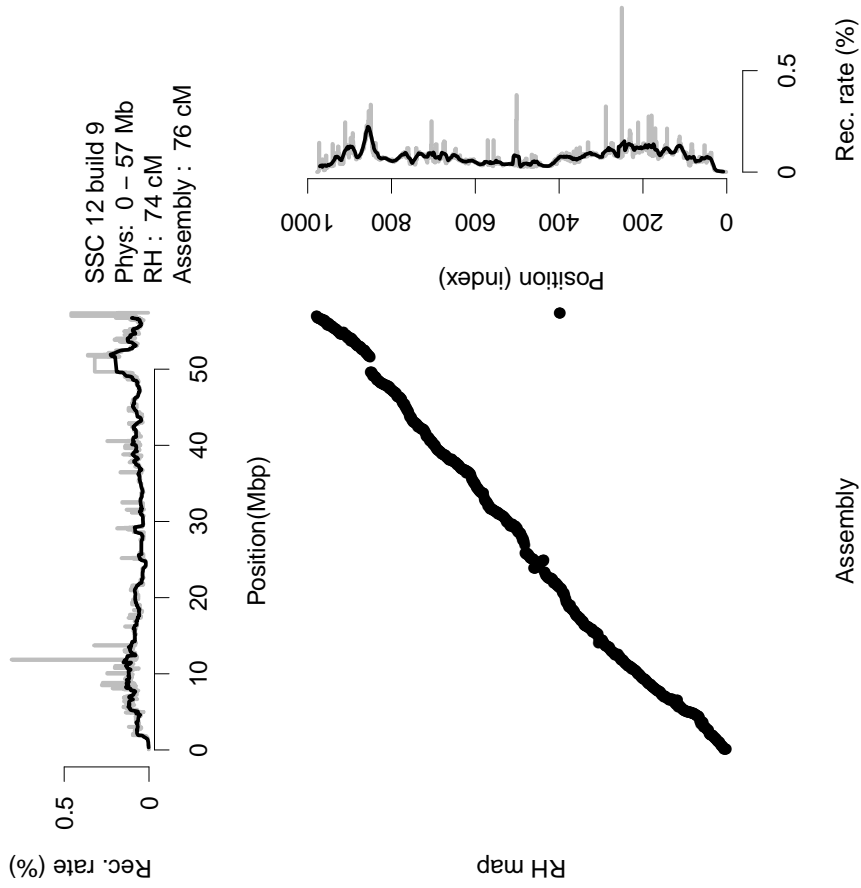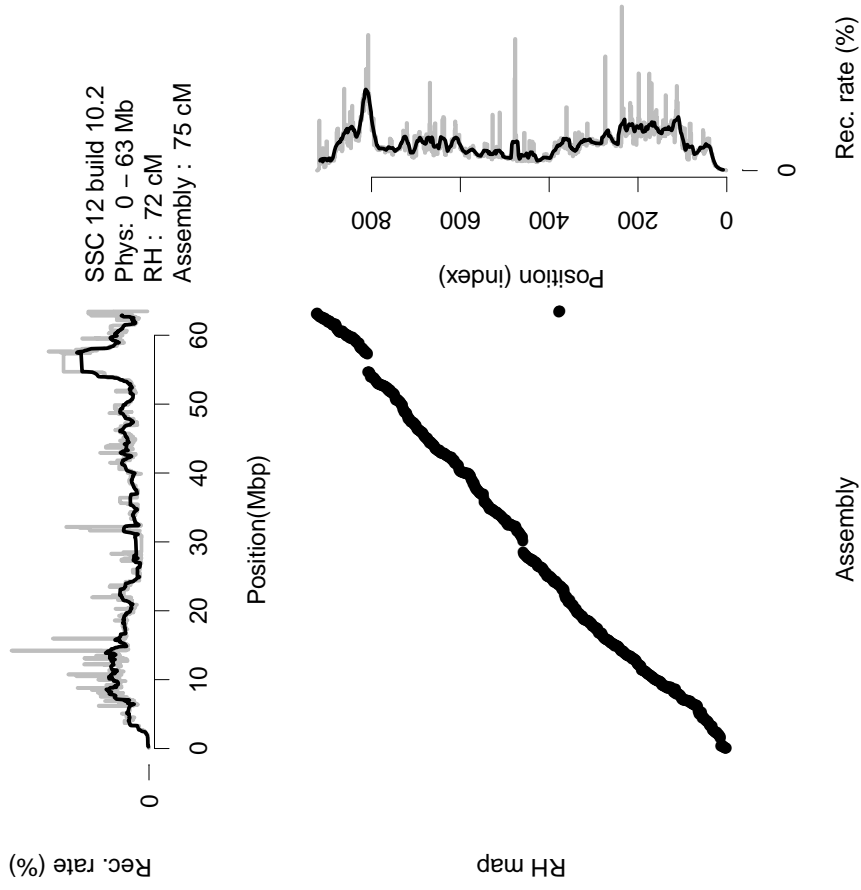

# SSC12 Zoom 1

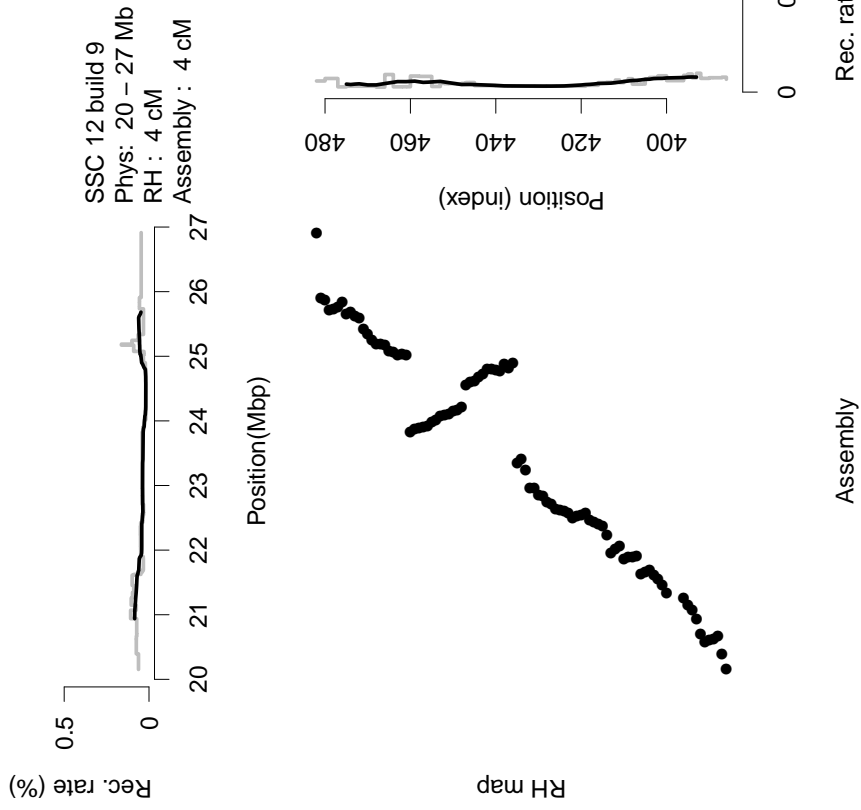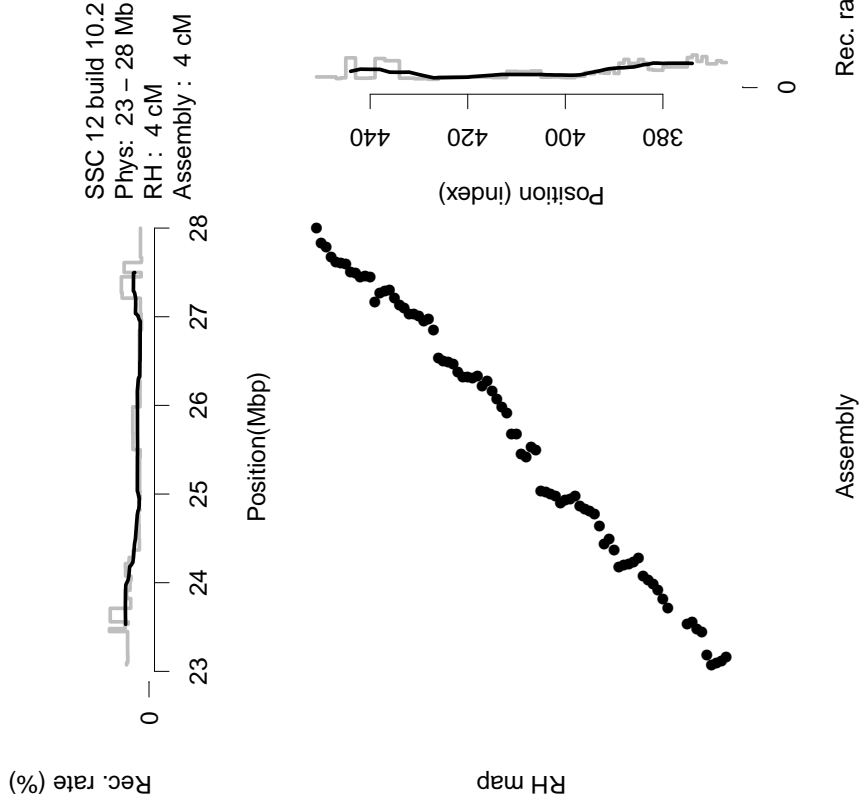

# SSC13

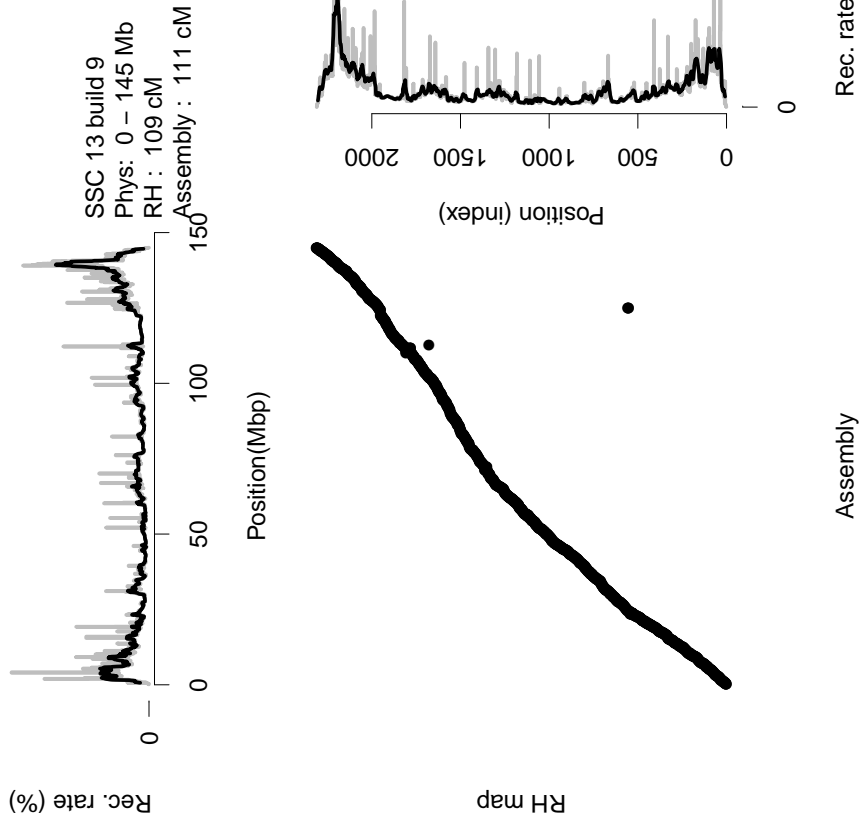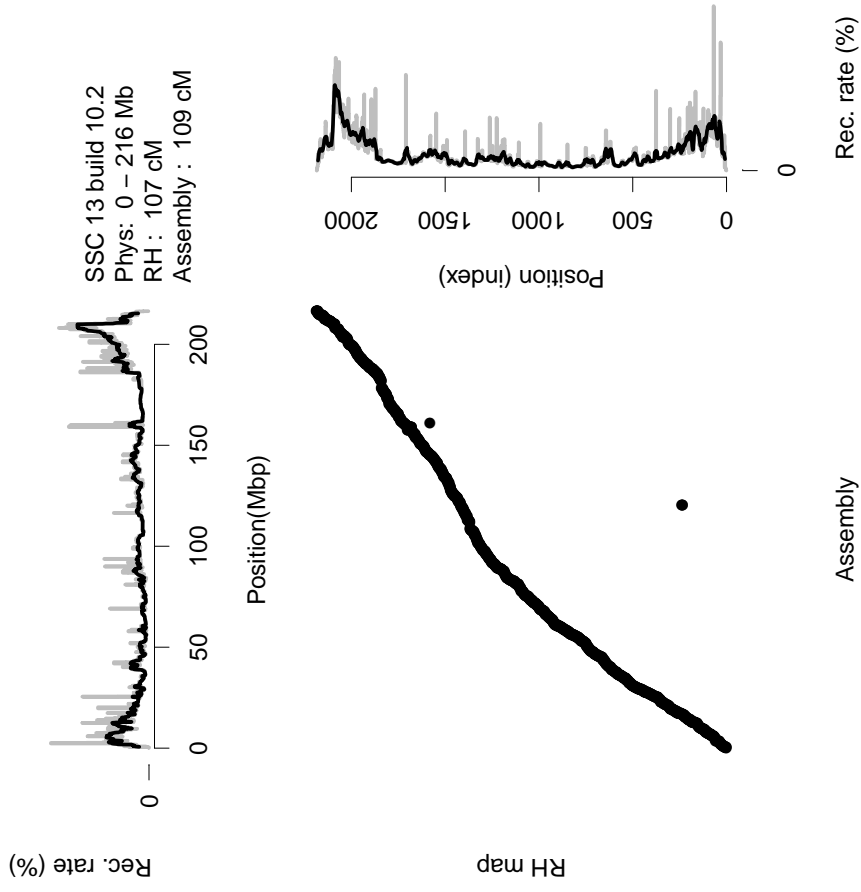



# SSC14

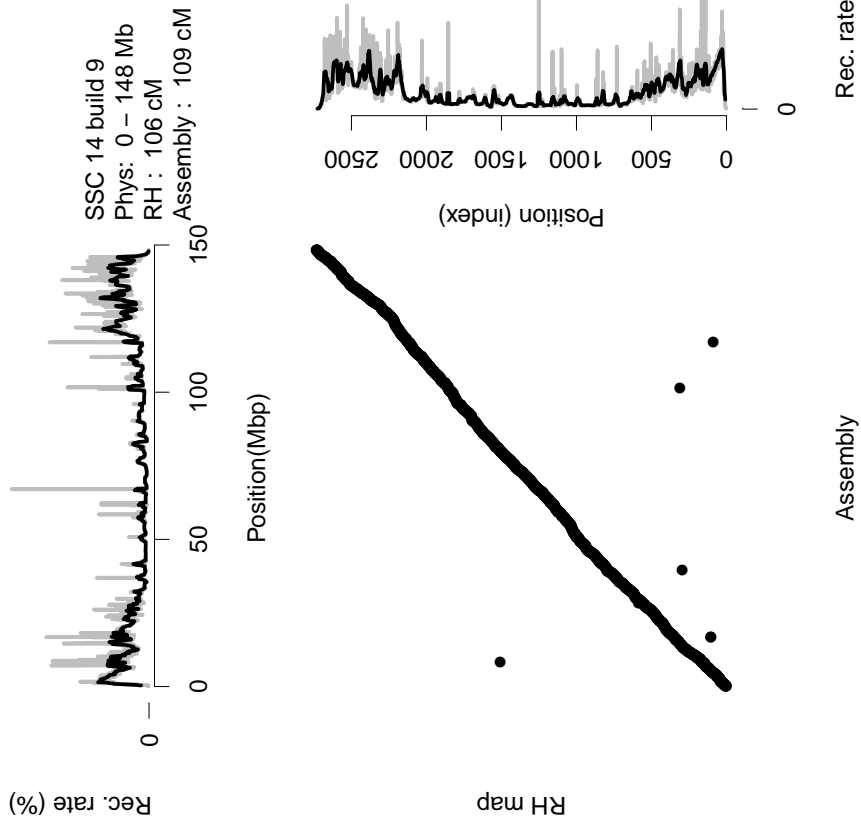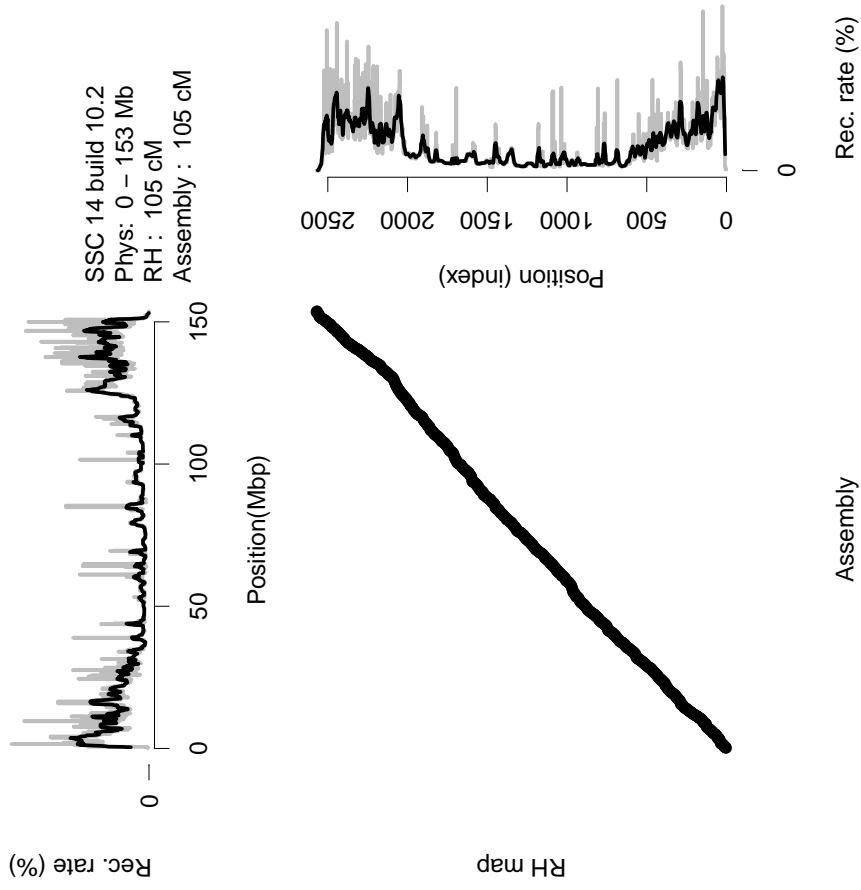

# SSC15

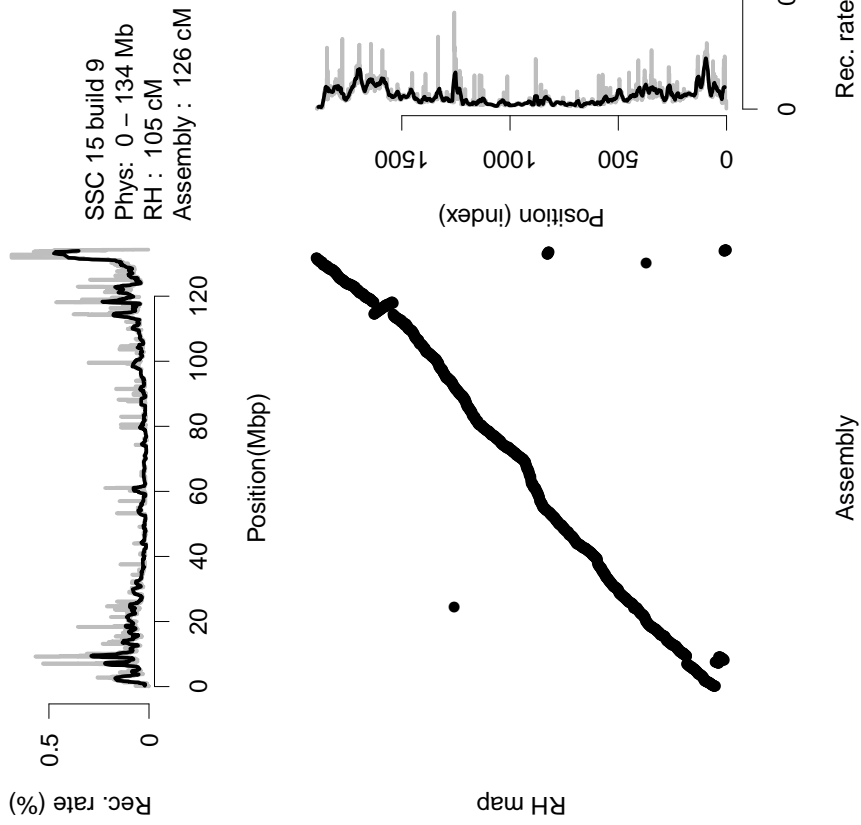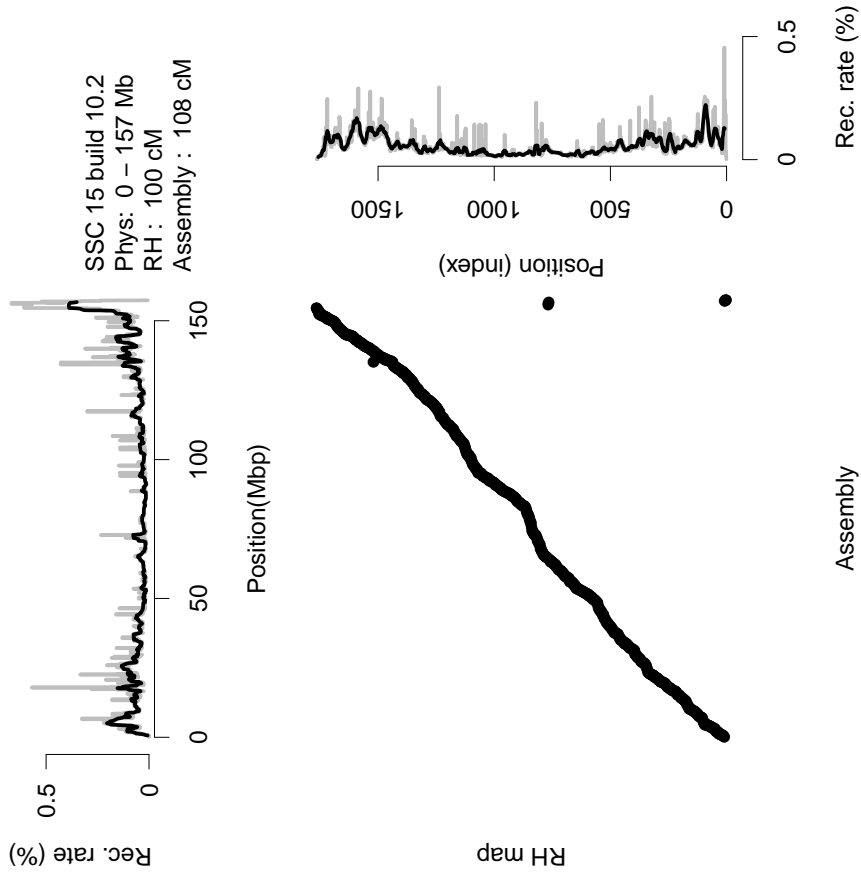

# SSC15 Zoom 1

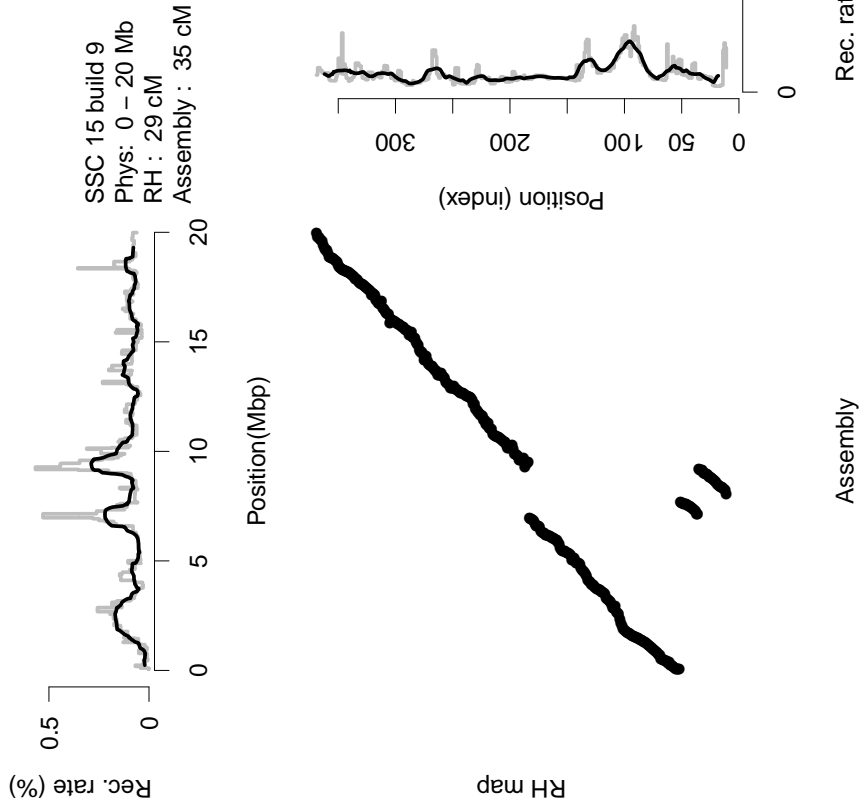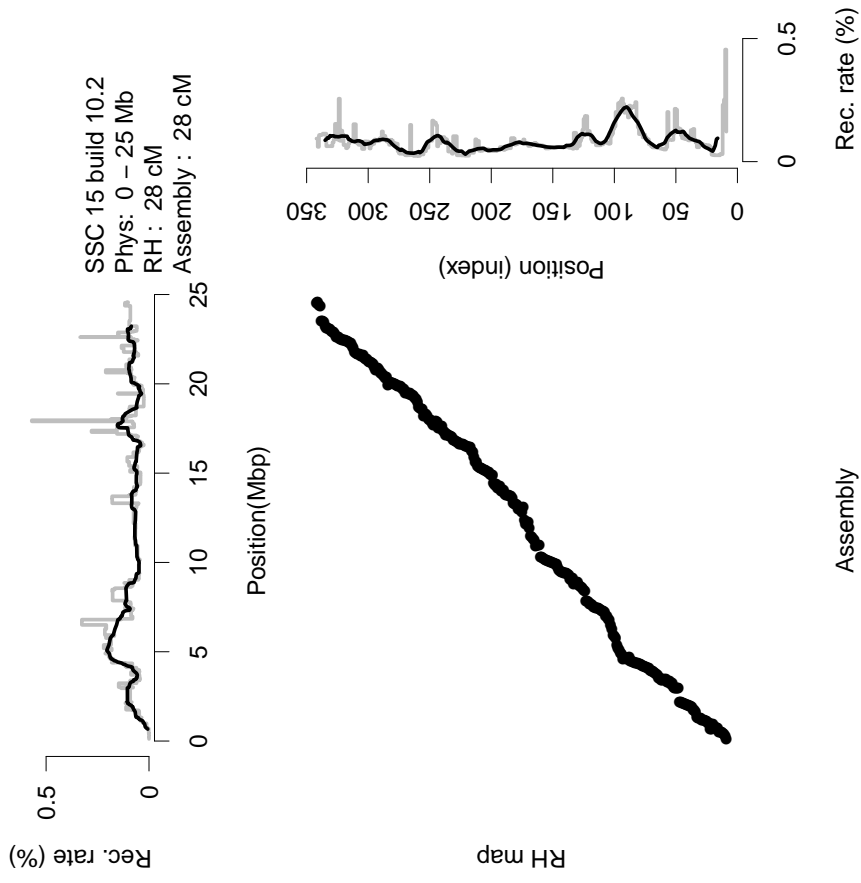

# SSC15 Zoom 2

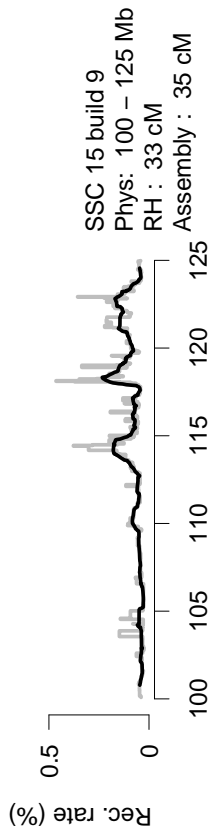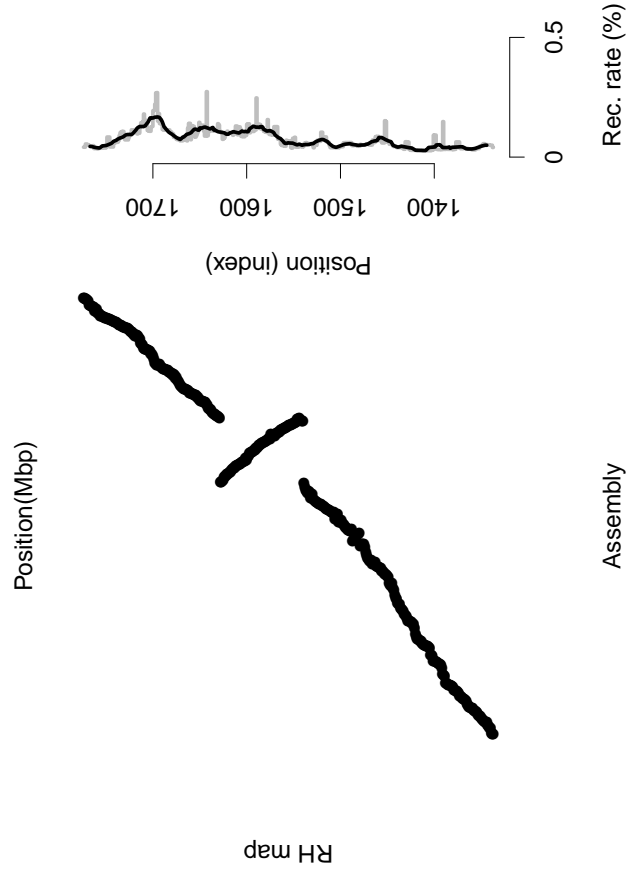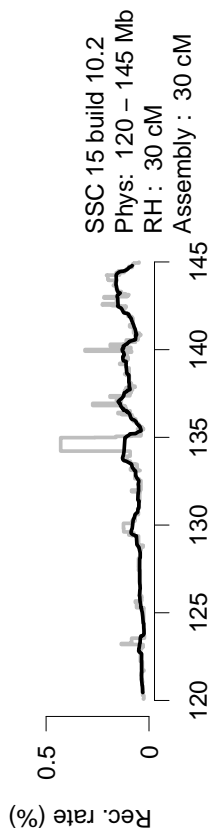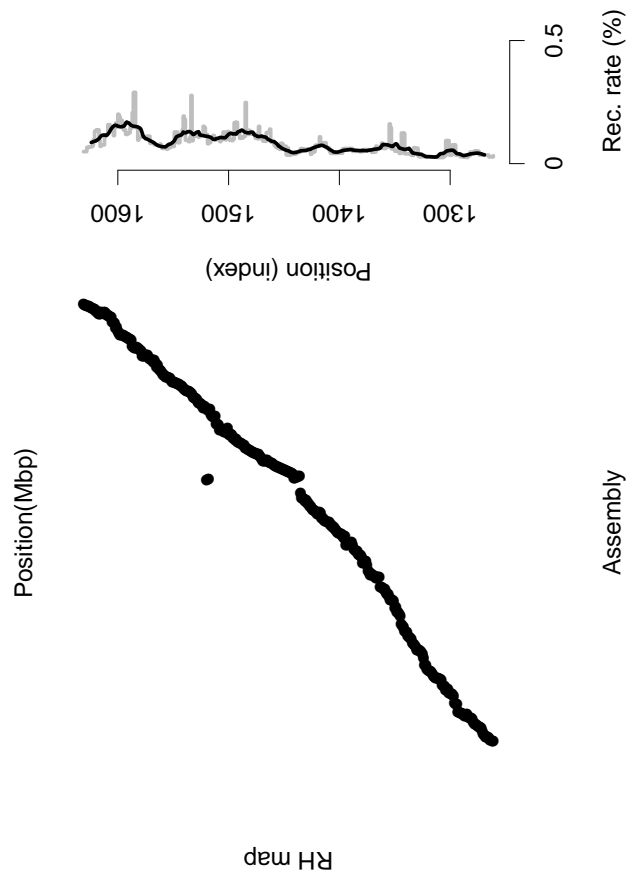

# SSC16

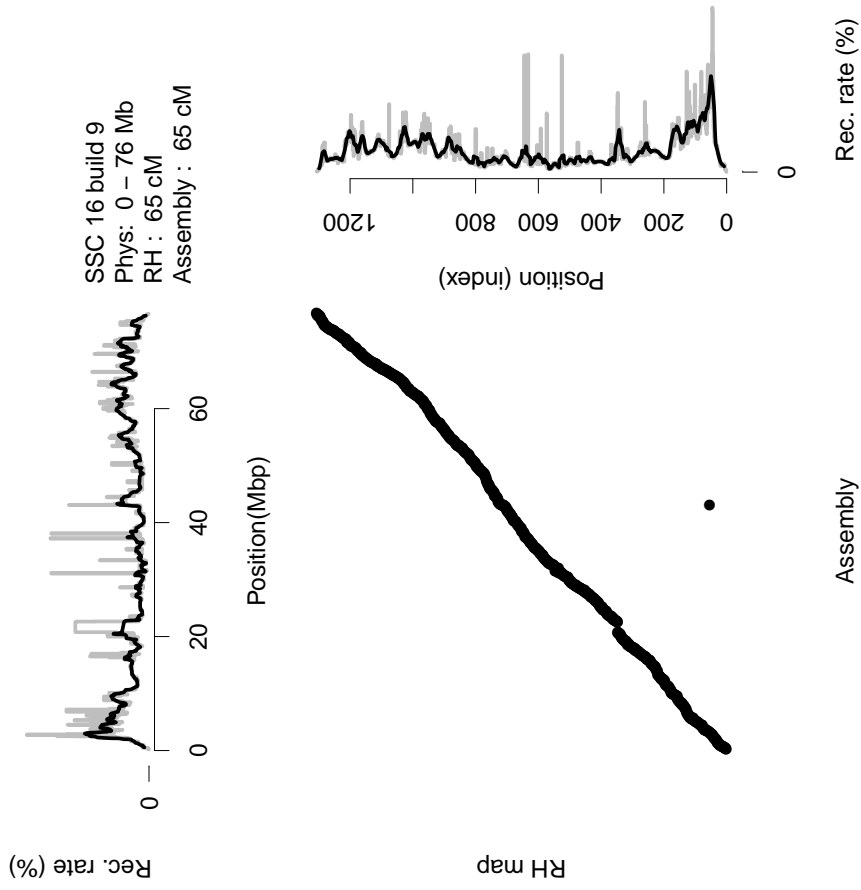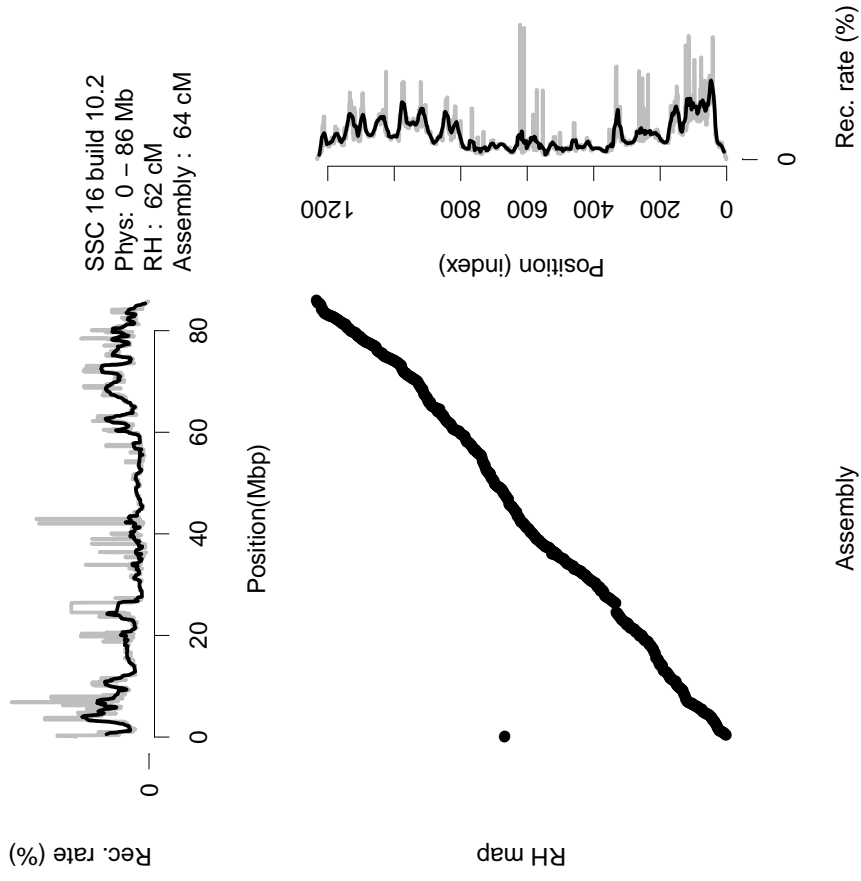

# SSC17

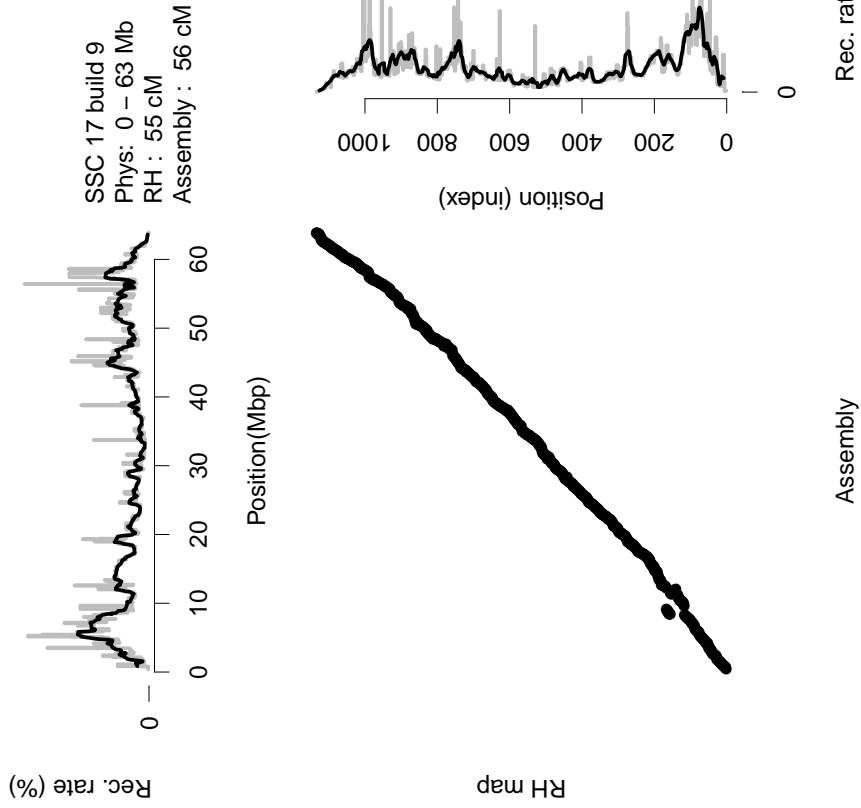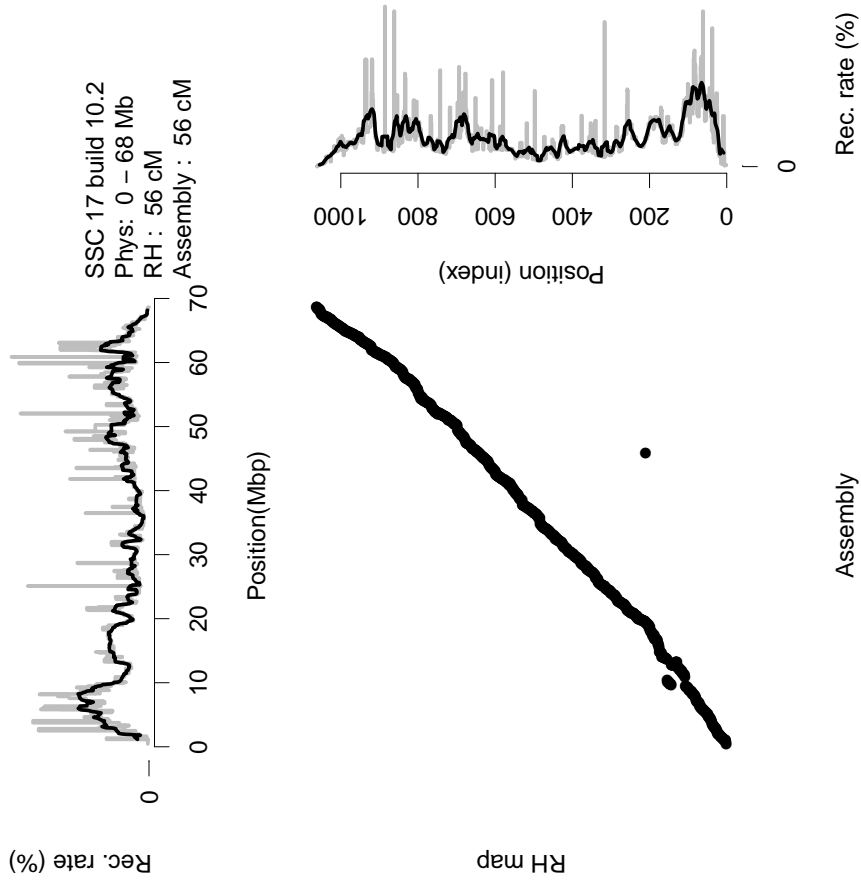

# SSC17 Zoom 1

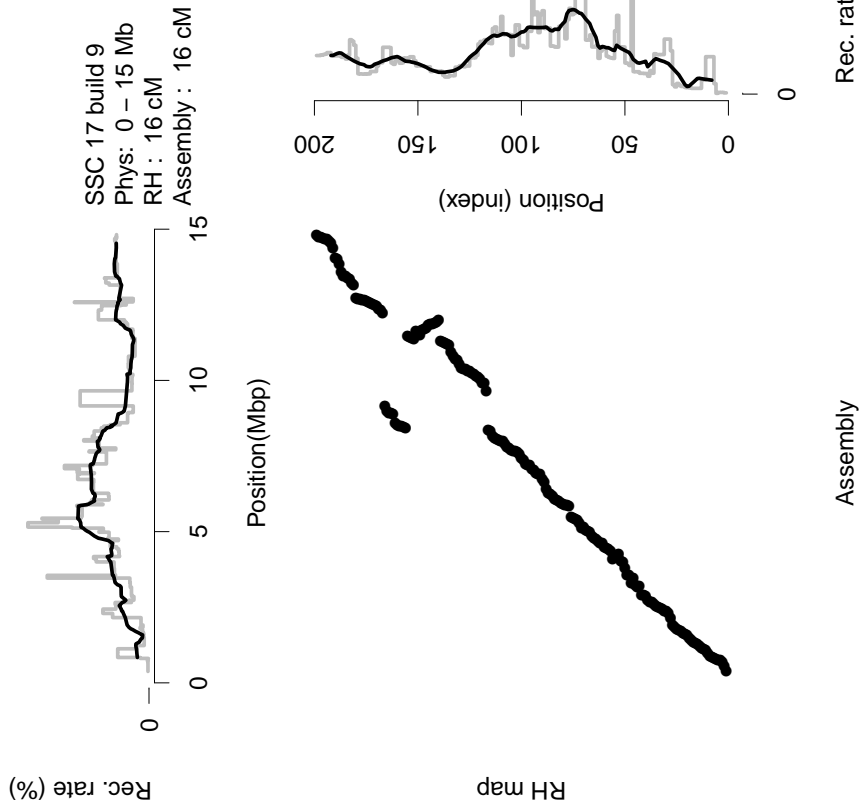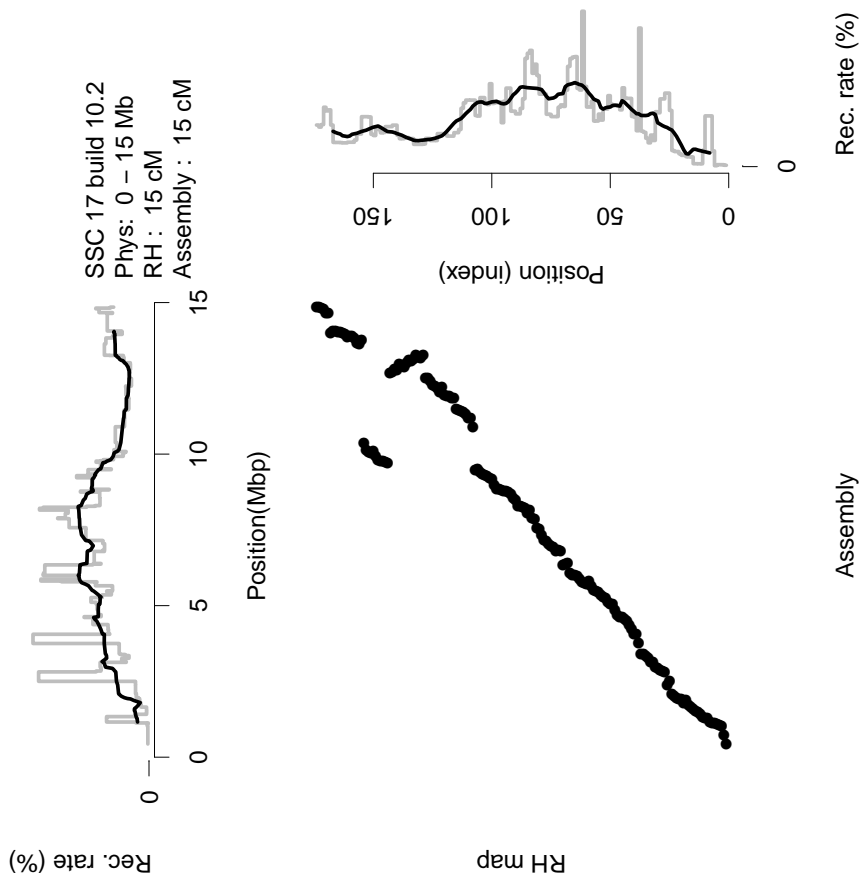

# SSC18

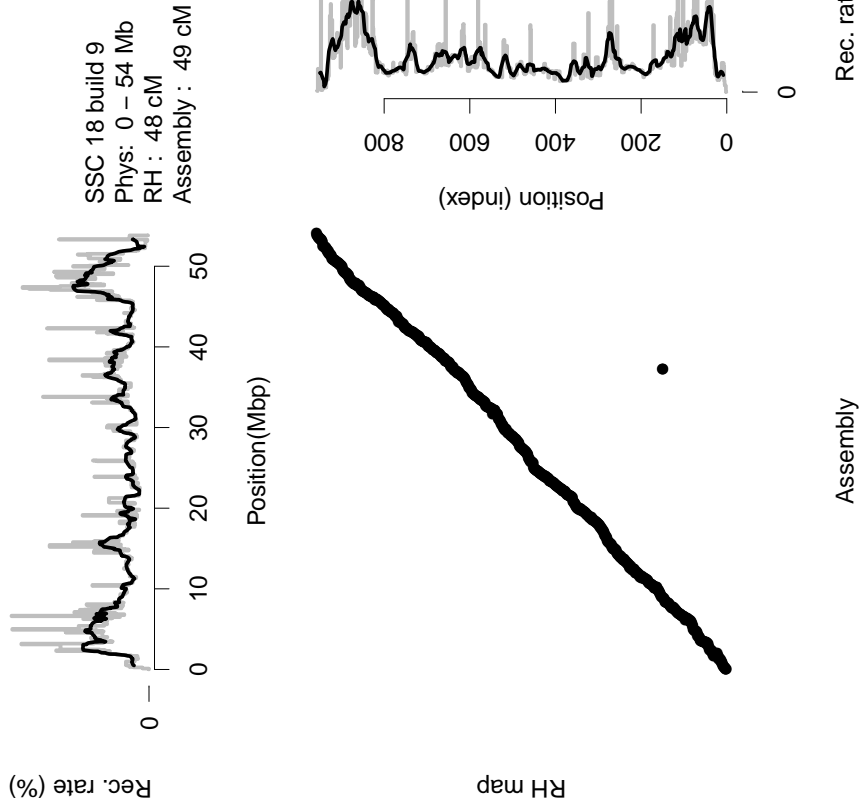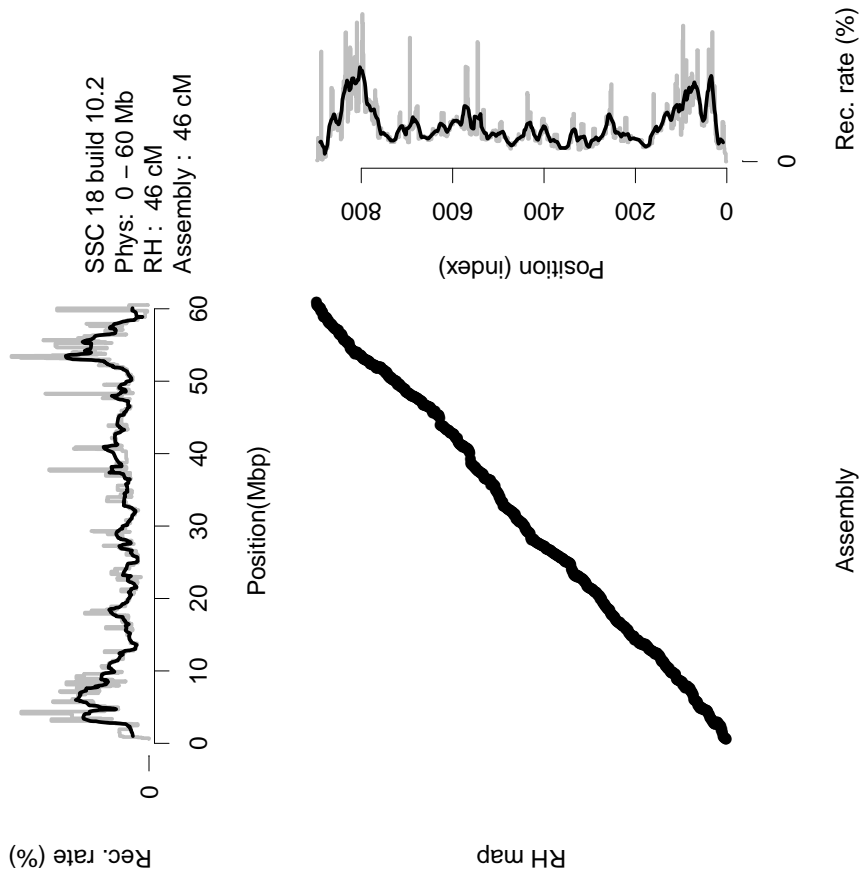

Supplement: 1471-2164-13-585-S3.pdf [file 1471-2164-13-585-S3.pdf]
