# Supplementary material for: High-resolution autosomal radiation hybrid maps of the pig genome and their contribution to the genome sequence assembly
Source: PubMed Central journal article supplement (PMC3499281; doi:10.1186/1471-2164-13-585), 2012-11-15
Supplement: 1471-2164-13-585-S2.pdf [file 1471-2164-13-585-S2.pdf]

| SSC | IMpRRH panel (7000 rad)   |       |                        |                                             |                       | IMNpRRH2 Panel (12000 rad) |                        |                                             |                       |                  |    |
|-----|---------------------------|-------|------------------------|---------------------------------------------|-----------------------|----------------------------|------------------------|---------------------------------------------|-----------------------|------------------|----|
|     | size <sup>†</sup><br>(Mb) | SNPs  | positions <sup>‡</sup> | positions <sup>‡</sup><br>distance*<br>(cR) | resolution<br>(kb/cR) | retention<br>(%)           | positions <sup>‡</sup> | positions <sup>‡</sup><br>distance*<br>(cR) | resolution<br>(kb/cR) | retention<br>(%) |    |
| 1   | 307                       | 5417  | 5180                   | 4083                                        | 5.6                   | 10                         | 32                     | 4808                                        | 9.0                   | 6.3              | 33 |
| 2   | 118                       | 2451  | 2373                   | 1934                                        | 6.7                   | 7.2                        | 28                     | 2197                                        | 10.5                  | 4.6              | 34 |
| 3   | 104                       | 2057  | 1963                   | 1564                                        | 6.4                   | 7.9                        | 31                     | 1842                                        | 10.7                  | 4.7              | 34 |
| 4   | 126                       | 2736  | 2639                   | 2107                                        | 6.2                   | 7.5                        | 32                     | 2431                                        | 8.3                   | 5.6              | 36 |
| 5   | 92                        | 1813  | 1773                   | 1523                                        | 6.8                   | 7.4                        | 37                     | 1631                                        | 10.0                  | 5.1              | 36 |
| 6   | 140                       | 2134  | 2058                   | 1613                                        | 6.7                   | 9.8                        | 29                     | 1916                                        | 12.4                  | 5.3              | 33 |
| 7   | 107                       | 2743  | 2643                   | 2168                                        | 6.5                   | 6.0                        | 30                     | 2409                                        | 9.0                   | 4.3              | 31 |
| 8   | 114                       | 2001  | 1915                   | 1526                                        | 5.8                   | 9.8                        | 30                     | 1763                                        | 10.5                  | 5.4              | 34 |
| 9   | 115                       | 2193  | 2108                   | 1716                                        | 6.5                   | 8.1                        | 33                     | 1922                                        | 9.5                   | 5.5              | 35 |
| 10  | 52                        | 1202  | 1159                   | 876                                         | 5.5                   | 7.9                        | 36                     | 1099                                        | 10.6                  | 4.1              | 36 |
| 11  | 51                        | 1406  | 1351                   | 1060                                        | 6.6                   | 5.5                        | 30                     | 1267                                        | 10.6                  | 3.4              | 33 |
| 12  | 37                        | 1047  | 992                    | 781                                         | 6.9                   | 5.1                        | 28                     | 904                                         | 10                    | 3.6              | 29 |
| 13  | 201                       | 2516  | 2393                   | 1808                                        | 6.2                   | 12.                        | 21                     | 2235                                        | 11.6                  | 6.9              | 29 |
| 14  | 137                       | 2916  | 2752                   | 2014                                        | 5.2                   | 9.0                        | 25                     | 2522                                        | 8.6                   | 5.5              | 29 |
| 15  | 134                       | 2074  | 1981                   | 1555                                        | 5.4                   | 12.0                       | 31                     | 1864                                        | 10.8                  | 6.0              | 34 |
| 16  | 71                        | 1413  | 1359                   | 1092                                        | 6.1                   | 8.3                        | 41                     | 1245                                        | 10.2                  | 4.9              | 35 |
| 17  | 59                        | 1232  | 1189                   | 946                                         | 6.6                   | 7.3                        | 28                     | 1121                                        | 9.6                   | 5.1              | 35 |
| 18  | 51                        | 1028  | 988                    | 800                                         | 6.3                   | 7.9                        | 36                     | 902                                         | 10.5                  | 4.7              | 35 |
| all | 2016                      | 38379 | 36816                  | 29166                                       | 6.1                   | 8.6                        | 31                     | 34078                                       | 9.9                   | 5.3              | 33 |

### Radiation-Hybrid map characteristics

- †: size covered by SNPs on the RH map
- ‡: number of distinct positions on the maps
- \* : average distance between two markers
