# Supplementary material for: High-resolution autosomal radiation hybrid maps of the pig genome and their contribution to the genome sequence assembly
Source: PubMed Central journal article supplement (PMC3499281; doi:10.1186/1471-2164-13-585), 2012-11-15
Supplement: 1471-2164-13-585-S7.pdf [file 1471-2164-13-585-S7.pdf]

# multiple hits

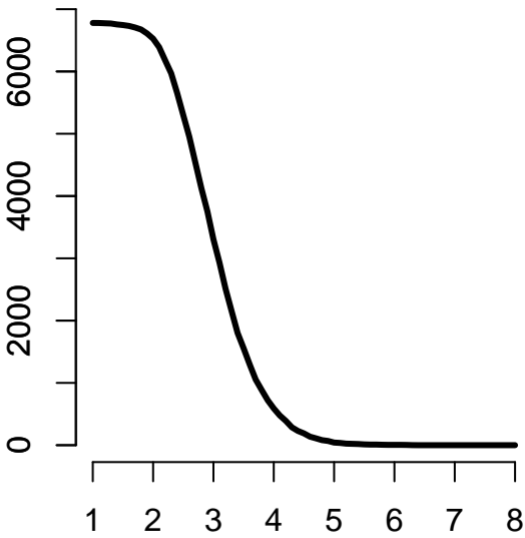

Similarity score
